# Supplementary material
Source: PubMed Central journal article supplement (PMC8218656)
Supplement: aac.02685-20-s0001.pdf [file aac.02685-20-s0001.pdf]

1 *Staphylococcus saprophyticus* causing infections in humans are associated with high resistance to  
2 heavy metals

3 Opeyemi U. Lawal,<sup>a,b</sup> Maria J. Fraqueza,<sup>c</sup> Peder Worning,<sup>d</sup> Ons Bouchami,<sup>a,b</sup> Mette D. Bartels,<sup>d</sup>  
4 Luisa Goncalves,<sup>e</sup> Paulo Paixão,<sup>f</sup> Elsa Goncalves,<sup>g</sup> Cristina Toscano,<sup>g</sup> Joanna Empel,<sup>h</sup> Malgorzata  
5 Urbaś,<sup>h</sup> Maria A. Domínguez,<sup>i</sup> Henrik Westh,<sup>d,j</sup> Hermínia de Lencastre,<sup>b,k</sup> Maria Miragaia<sup>a#</sup>

6 <sup>a</sup>Laboratory of Bacterial Evolution and Molecular Epidemiology, Instituto de Tecnologia Química  
7 e Biológica, Universidade Nova de Lisboa (ITQB-NOVA), Oeiras, Portugal.

8 <sup>b</sup>Laboratory of Molecular Genetics, ITQB-NOVA, Oeiras, Portugal.

9 <sup>c</sup>Centre for Interdisciplinary Research in Animal Health (CIISA), Faculdade de Medicina  
10 Veterinária, Universidade de Lisboa, Lisboa, Portugal.

11 <sup>d</sup>Department of Clinical Microbiology, Hvidovre University Hospital, Hvidovre, Denmark;

12 <sup>e</sup>SAMS Hospital, Lisbon, Portugal.

13 <sup>f</sup>Hospital da Luz, Lisbon, Portugal.

14 <sup>g</sup>Hospital Egas Moniz, Lisbon, Portugal.

15 <sup>h</sup>Department of Epidemiology and Clinical Microbiology, Narodowy Instytut Leków, Warszawa,  
16 Poland.

17 <sup>i</sup>Hospital Universitari de Bellvitge, Barcelona, Spain.

18 <sup>j</sup>Institute of Clinical Medicine, Faculty of Health Sciences, University of Copenhagen,  
19 Copenhagen, Denmark.

20 <sup>k</sup>The Laboratory of Microbiology and Infectious Diseases, The Rockefeller University, New York,  
21 USA.

22 Running Head: Heavy metal resistance in uropathogenic *S. saprophyticus*

23 #Address correspondence to Maria Miragaia, [miragaia@itqb.unl.pt](mailto:miragaia@itqb.unl.pt)

24

25

26

## Supplementary Materials

### 27 Supplementary Figures

28 Fig. S1 | Distribution of arsenic (a) and cadmium (b) MICs of *Staphylococcus saprophyticus* as  
29 determined by agar dilution. “MIC in the population” is the proportion of isolates with the MIC  
30 value, the “Resistant determinant” is the proportion of *S. saprophyticus* strains with the MIC value

31 carrying (a) a complete ars operon (*arsRDABC*) for arsenic, (b) carrying at least three cad genes  
32 including *cadA* and/or *cadC* for cadmium.

33 Fig. S2 | Distribution of genetic determinants associated with resistance to arsenic in 422  
34 *Staphylococcus saprophyticus* as determined by *in-silico* analysis and pan-GWAS. Association  
35 between different susceptibility levels of *S. saprophyticus* isolates to arsenic and any gene(s)  
36 among the 9,182 genes that constituted the accessory genome were tested using Scoary.  
37 Associations were deemed significant with Bonferroni and best pairwise comparison p value of  
38 <0.05 and odd ratio of >1. Genes marked by asterisk were found to be associated to high-level  
39 tolerance to arsenic with both *in-silico* analysis and pan-GWAS approaches. Phylogenetic tree was  
40 constructed based on core-genome single nucleotide polymorphisms without recombination.  
41 Phylogenetic tree was visualised using a Microreact web tool.

42 Fig. S3 | Distribution of genetic determinants associated with resistance to cadmium in 422  
43 *Staphylococcus saprophyticus* as determined by *in-silico* analysis and pan-GWAS. Association  
44 between different susceptibility levels of *S. saprophyticus* isolates to arsenic and any gene(s)  
45 among the 9,182 genes that constituted the accessory genome were tested using Scoary.  
46 Associations were deemed significant with Bonferroni and best pairwise comparison p value of  
47 <0.05 and odd ratio of >1. Genes marked by asterisk were found to be associated to high-level  
48 tolerance to cadmium with both *in-silico* analysis and pan-GWAS approaches. Phylogenetic tree  
49 was constructed based on core-genome single nucleotide polymorphisms without recombination.  
50 Phylogenetic tree was visualised using a Microreact web tool.

51 **Supplementary Tables**

52 Table S1 | Demographic, genotypic and phenotypic characterisation of *Staphylococcus*  
53 *saprophyticus* isolates used in this study.

54 Table S2 | Distribution of known and new genes associated with resistance to arsenic (MIC  $\geq$ 1,600  
55 mg/L) and cadmium (200 mg/L) in *Staphylococcus saprophyticus* in this study.

56 Table S3 | Distribution of plasmid replication gene (*rep*) families associated with metal resistance  
57 determinants in *Staphylococcus saprophyticus* in this study.

## 58 **Appendix I**

59 Nucleotide sequences of the curated metal resistance genes used in this study

60

61

Fig. S1

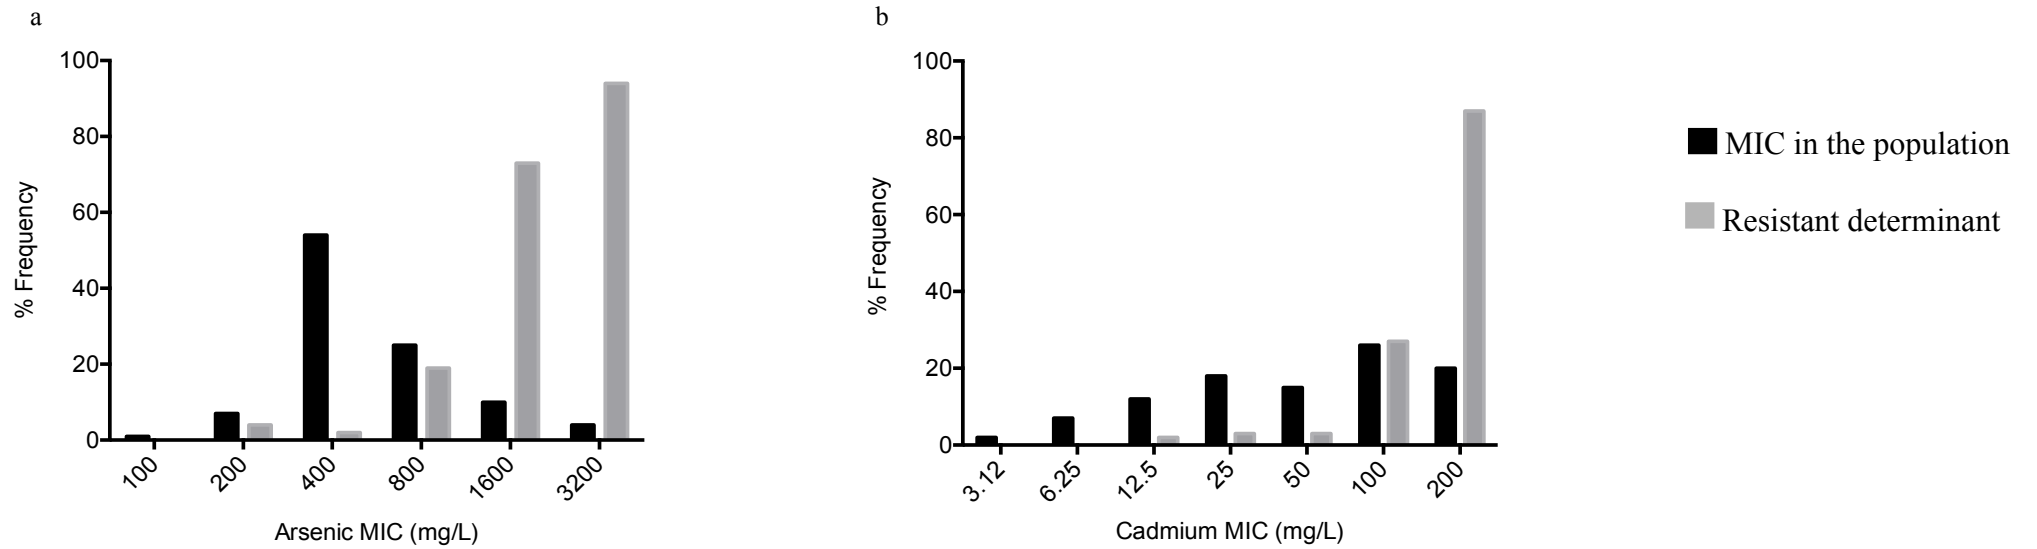

Fig. S1 | Distribution of arsenic **(a)** and cadmium **(b)** MICs of *Staphylococcus saprophyticus* as determined by agar dilution. “MIC in the population” is the proportion of isolates with the MIC value, the “Resistant determinant” is the proportion of *S. saprophyticus* strains with the MIC value carrying **(a)** a complete *ars* operon (*arsRDABC*) for arsenic, **(b)** carrying at least three *cad* genes including *cadA* and/ or *cadC* for cadmium.

Fig. S2

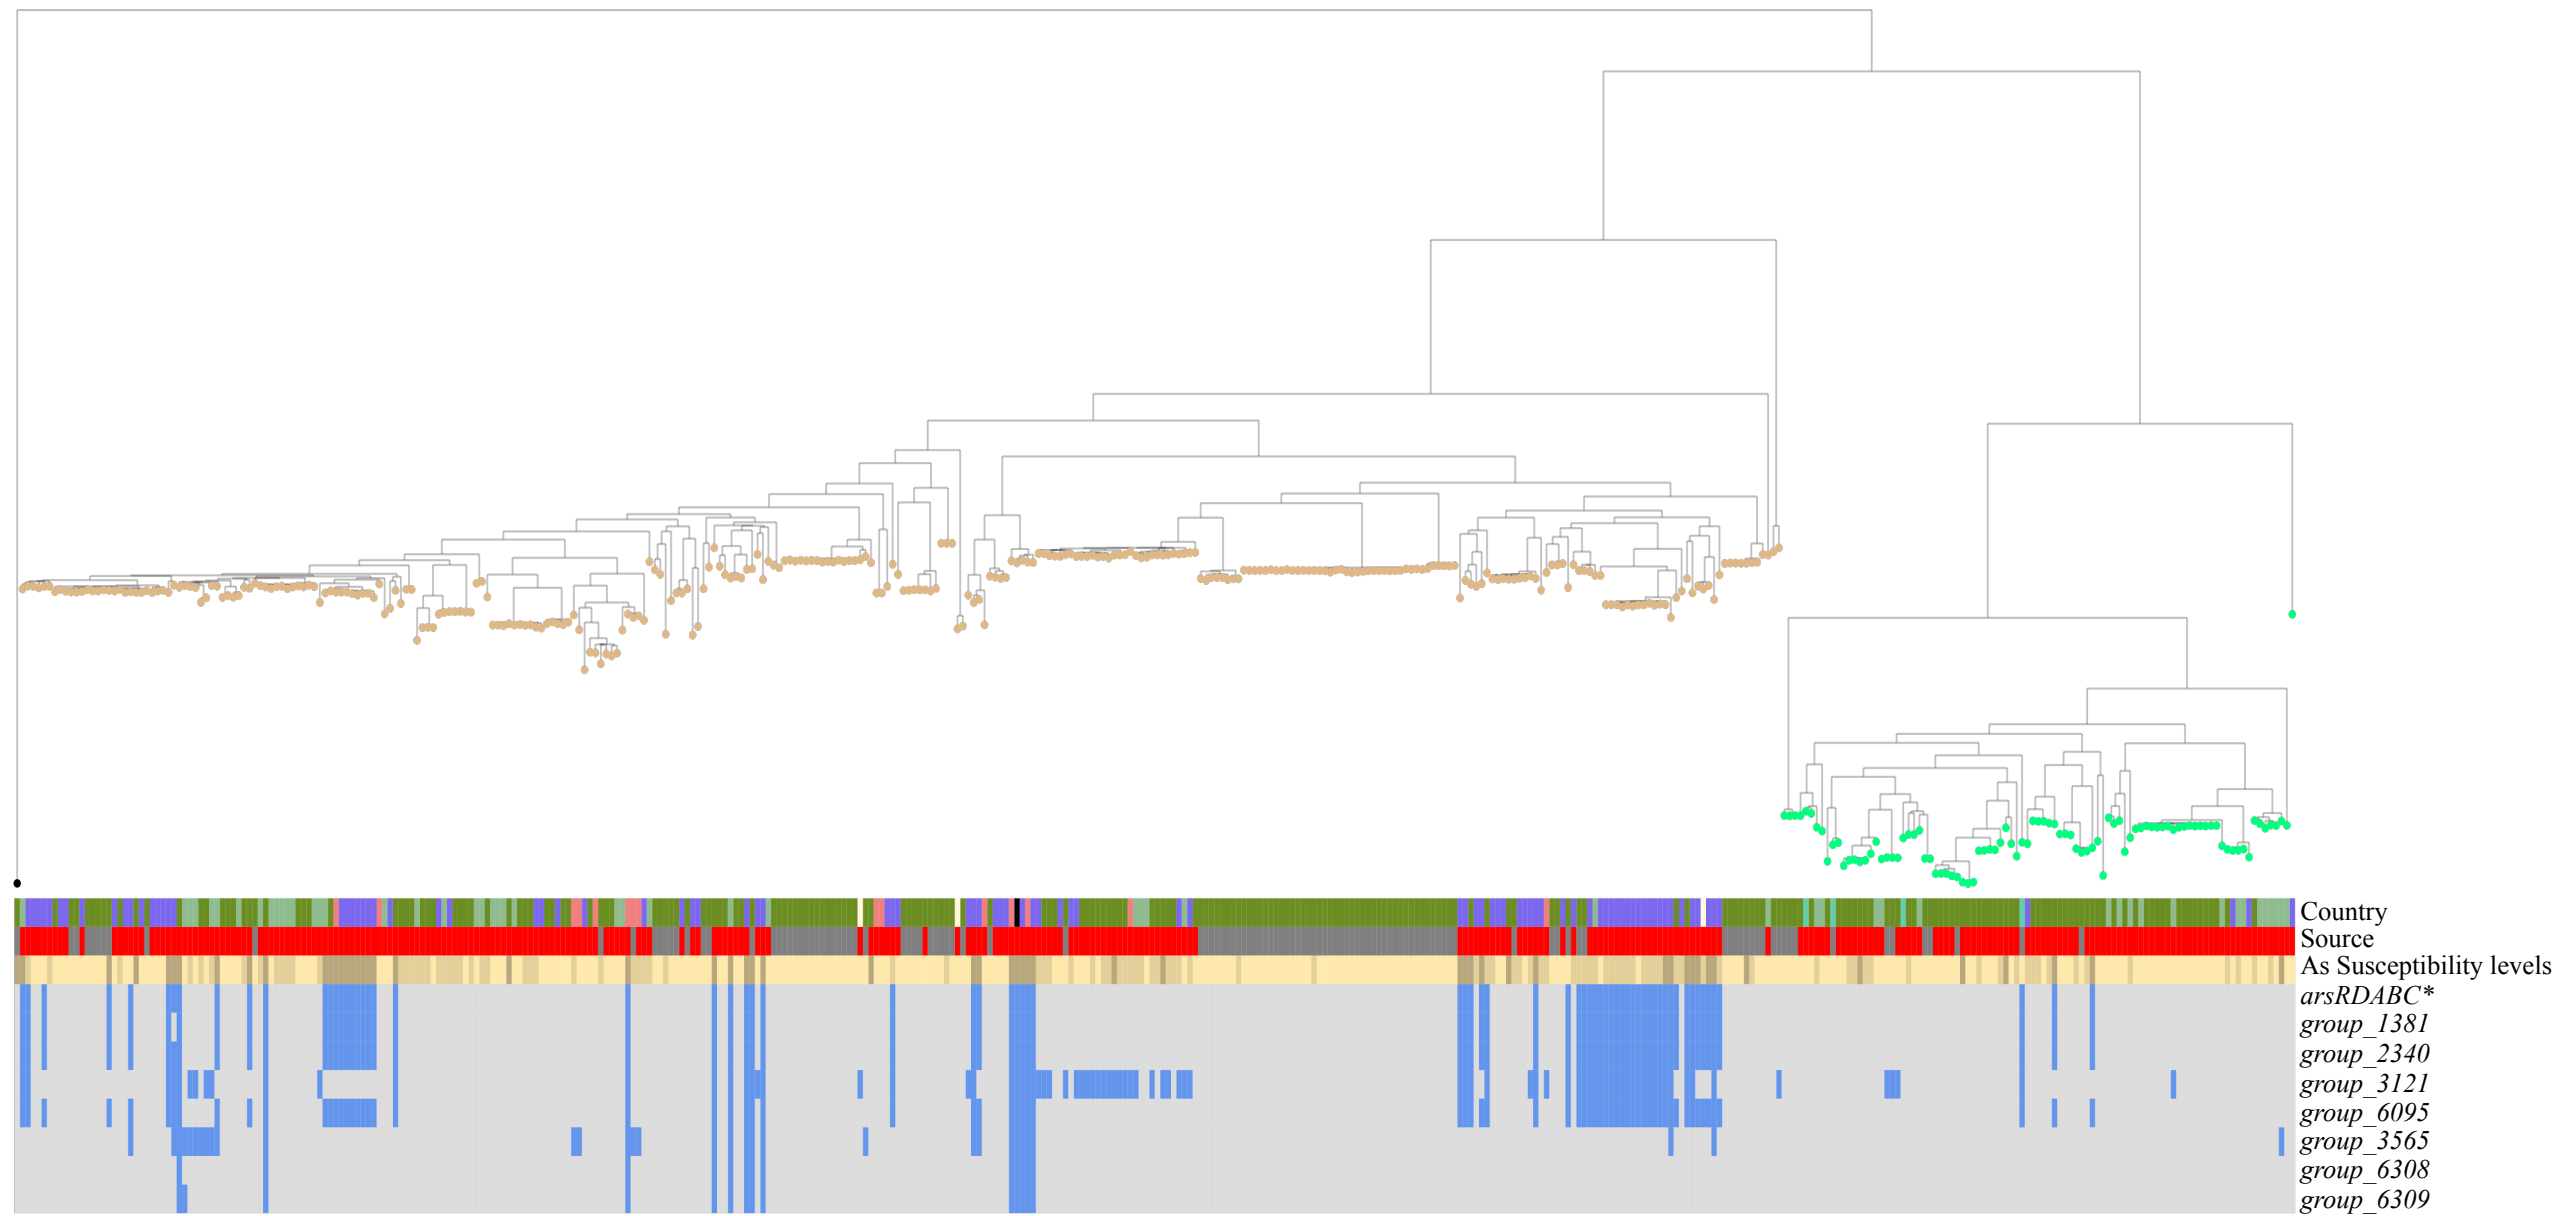

## Legend

### Lineages

- Lineage G
- Lineage S

### Source of isolates

- Human infection
- Human colonization/contamination and environmental sources

### Country of isolation

- Brazil
- Bulgaria
- Denmark
- Iceland
- Poland
- Portugal
- Spain

### Metal Susceptibility level

- Susceptible
- Intermediate
- Resistant

### Metal resistance genes

- Present
- Absent

Fig. S2 | Distribution of genetic determinants associated with resistance to arsenic in 422 *Staphylococcus saprophyticus* as determined by *in-silico* analysis and pan-GWAS. Association between different susceptibility levels of *S. saprophyticus* isolates to arsenic and any gene(s) among the 9,182 genes that constituted the accessory genome were tested using Scoary. Associations were deemed significant with Bonferroni and best pairwise comparison p value of  $<0.05$  and odd ratio of  $>1$ . Genes marked with asterisk were found to be associated to high-level resistance to arsenic with both *in-silico* analysis and pan-GWAS approaches. Phylogenetic tree was constructed based on core-genome single nucleotide polymorphisms without recombination. Phylogenetic tree was visualized using a Microreact web tool.

Fig. S3

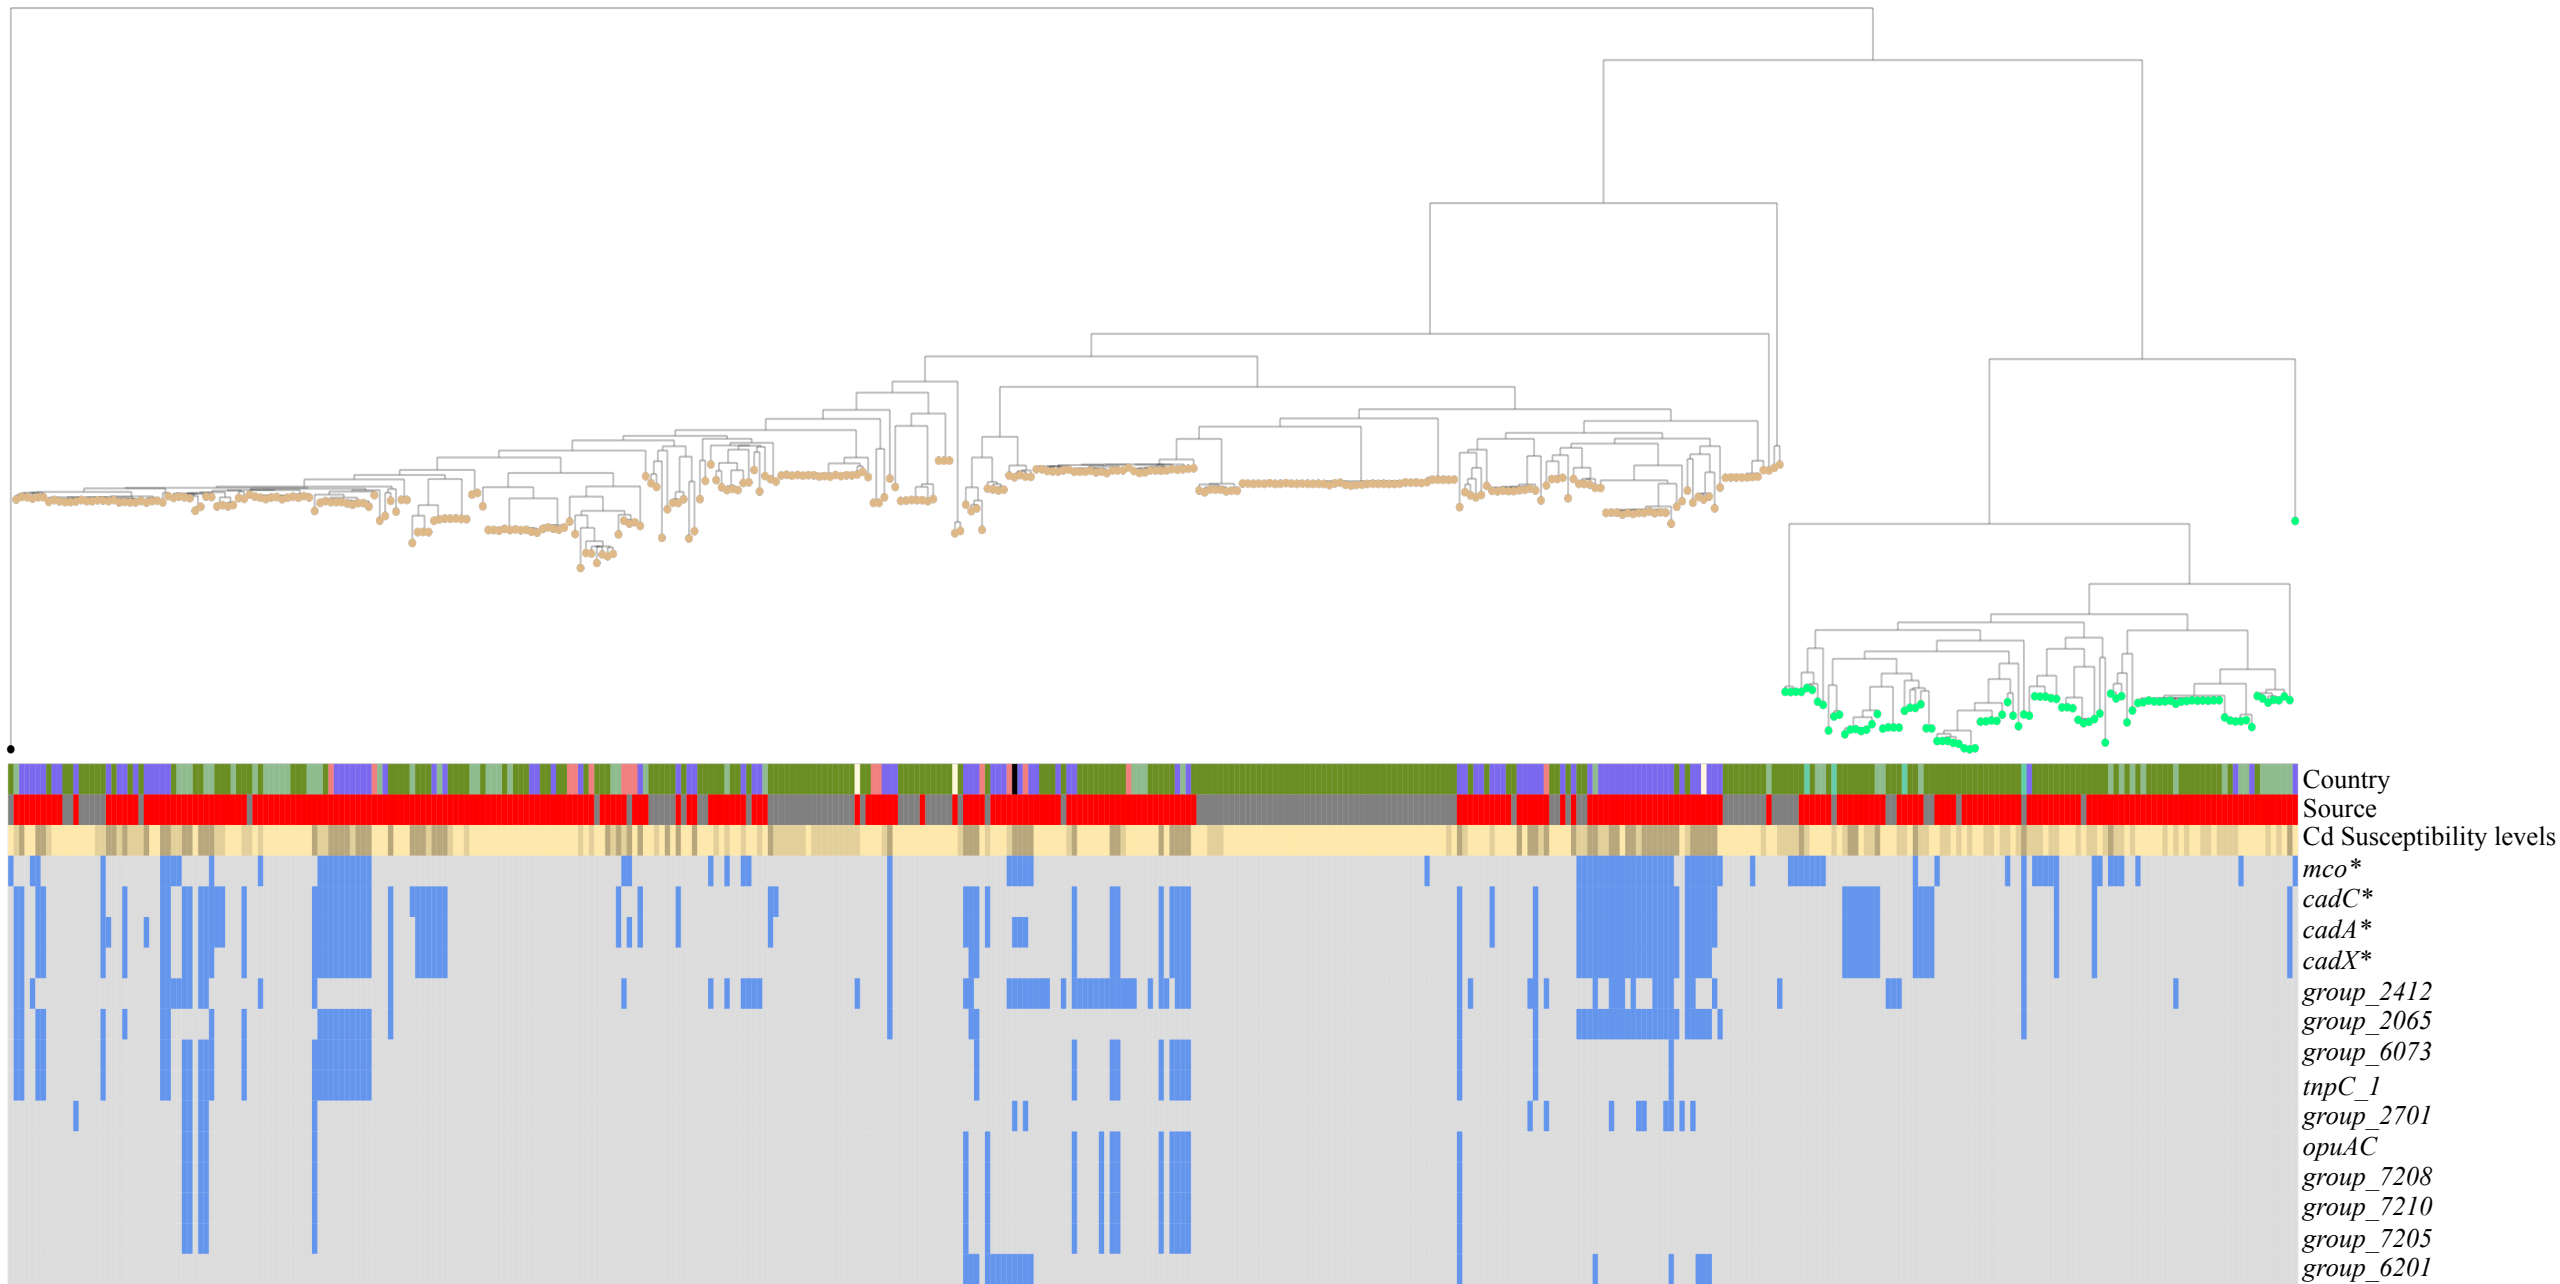

## Legend

### Lineages

- Lineage G
- Lineage S

### Source of isolates

- Human infection
- Human colonization/contamination and environmental sources

### Country of isolation

- Brazil
- Bulgaria
- Denmark
- Iceland
- Poland
- Portugal
- Spain

### Metal Susceptibility level

- Susceptible
- Intermediate
- Resistant

### Metal resistance genes

- Present
- Absent

Fig. S3 | Distribution of genetic determinants associated with resistance to cadmium in 422 *Staphylococcus saprophyticus* as determined by *in-silico* analysis and pan-GWAS. Association between different susceptibility levels of *S. saprophyticus* isolates to arsenic and any gene(s) among the 9,182 genes that constituted the accessory genome were tested using Scoary. Associations were deemed significant with Bonferroni and best pairwise comparison p value of  $<0.05$  and odd ratio of  $>1$ . Genes marked by asterisk were found to be associated to high-level tolerance to cadmium with both *in-silico* analysis and pan-GWAS approaches. Phylogenetic tree was constructed based on core-genome single nucleotide polymorphisms without recombination. Phylogenetic tree was visualized using a Microreact web tool.



## Appendix I

>cadX\_KR270450.2:4452-4799 *Staphylococcus aureus* strain SM31 plasmid pSM31, complete sequence

```
ATGAGTTATGAAAATACTTGTGATGTGATCTGTGTACATGAGGATAAAGTTAACAATGCTTTAAGTTT
TT
TAGAAGATGATAAATCTAAGAAATTACTTAACATTTTAGAAAAAATTTGTGATGAGAAGAAATTGAAA
AT
CATATTATCTTTGATTAAAGAAGATGAGTTGTGTGTTTGTGATATTTCTTTGATATTGAAAATGAGTG
TT
GCTTCAACTTCACATCATTTAAGGCTTTTATATAAAAATGAGGTACTIONGATTTTTATAAAGATGGAAA
GA
```

TGGCATATTATTTTATTAAGACGATGAAATAAGAGAGTTTTCTCTAAAAATCATGAGGGTTTTTGA

>cadX\_Staphylococcus saprophyticus KS103p\_25820 cadX\_2 putative cadmium efflux system accessory protein 2549160:2549507 reverse

```
ATGAGCTATAAAAATGCTTGTGATGTGATCTGTGTACATGAGGATAAAGTTAACAATGCC
TTAAGTTTTTTAGAAGATGATAAATCTAAGAAATTACTTAACATTTTAGAAAAGATTTGT
GATGAGAAGAAATTGAAAATTATATTATCTTTGATTAAAGAAGATGAGTTGTGTGTTTGT
GATATTTCTTTGATATTGAAAATGAGTGTGCTTCAACTTCACATCATTTAAGACTTTTA
TATAAAAATGATGTGCTTGATTTTTATAAAAAGGGAAAGATGGCATATTATTTTATTA
GACGATGAAATAAGAGAGTTTTCTCTAAAAATCAGGAGGGTTTTTGA
```

>cadX1\_Staphylococcus saprophyticus KS103p\_24970 cadX\_1 putative cadmium efflux system accessory protein 2459095:2459463 reverse

```
ATGAAAAAGAAAGATACTTGTGAAATTTTTTGTATGACGAAGAAAAGGTTAATCGAATA
CAAGGGGATTTACAAACAGTTGATATTTCTGGTGTAGCCAAATGTTAAAGGCTATTGCC
GATGAAAATAGAGCAAAAATTACTTACGCTCTGTGTCAGGATGAAGAGTTGTGTGTTTGT
GATATAGCAAATATCTTAGGTGTACGATAGCAAATGCATCTCATCATTTACGTACGCTT
TATAAGCAAGGGGTGGTCAACTTTAGAAAAGAAGGAAAAGTAGCTTTCTATTCTTTAGAT
GATGAACATATCAGGCAGATAATGATGATCGCCCTAGCACATAAGAAAGAAGTGAAGGTC
AATGTCTGA
```

>copA\_ENA|BAE17442|BAE17442.1 *Staphylococcus saprophyticus*

```
ATGACTGAACAGAAAAAGACGACCATTGGCATTACTGGAATGACATGTGCTGCCTGTGCC
AATCGCATTGAGAAAAACTTAAATAAATTAGATGATGTAGAAGCAAATGTGAATGTTACA
ACTGAAAAAGCTACAATATCTTACAACCCAGAATCAACATCCGCAGATGATTTAACAAAA
ACCATAGAAAAAACAGGTTATGGTGTGTTAAATGAAACAGCTGAGTTAGATGTTATTGGC
ATGACGTGTGCAGCATGTTCTAACCGAATTGAAAAAGTATTGAATCGTACAGATGGTGTA
GATCAAGCAACAGTCAATTTAACAACCTGAAAATGCTACGATTTCTATAATCCTAGTGCA
ACGTCTGTTGATGCATTAATTAATAAAAAATACAAAAAATAGGTTACGATGCACAACCCAAA
AAAGAGGTGGCCGAAAAAAGTTCACAAAAAGAATTAGAATTAAGAAGCAAATTAGTTAAA
TTAATCATTTCTGCAGTGTGGCCGCGCCACTCTTGCTAACAAATGCTTGTACATCTTTTC
GGTATACAAATTCATCTATTTTTATGAATCCTTGGTTCCAATTTATATTGGCAACACCG
GTTCAATTTATTATCGGATGGCAATTTTATGTTGGAGCTTACAAAAACTTAAGAAATGGC
TCAGCAAATATGGACGTACTIONGATTAGGTACAAGTGCCGCCTATTTCTACAGTTTA
TACGAAATGGTCAAATGGCTATTTAATGCTAATGTGATGCCTCATTTATATTTCGAAACA
AGTGCCGTATTAATTACACTTATTTTTATTTGGTAAATATTTAGAAACTCGTGCAAAAACA
CAAACGACAAATGCATTAAGTGAATTATTGAATCTTCAAGCCAAAGAAGCGCGTTTTG
CGGGACAATAAAGAACAGATGATACCGCTAAACGATGTGGTTGAAGGCGATTATTTAATT
ATTAACCTGGTAAAAAATACCTGTAGACGGTAAAATCATTAAAGGAAAAACGTCTATT
GATGAATCGATGCTAACTGGTGAATCCATGCCAGTTGAAAAAGTGCAAGATGATAACGTT
ATCGGTTCAACTATGAATAAAAATGGTTCTATCACTGTTAAAGCTACGAAGGTAGGAAAA
GATACTGCCCTCGCGTCTATTATTAAGTTGTTGAAGAAGCACAAAGGTTGAAAGCACCG
ATACAACGTCTAGCCGATGTTATTTAGGTTACTTTGTACCTATCGTCTGTTGGTATCGCA
GTACTCACTTTTATTATATGGATTGCATTCGTTCAACAAGGTCAATTTGAACCCGCATTA
GTTGCCGCAATTGCAGTACTCGTCATTGCGTGTCTTTGTGCACTTGGTTTAGCAACACCT
ACATCAATCATGGTAGGAACTGGAAAAGCTGCAGAAAACGGTATTTTATTTAAAGGTGGC
GAACACATTGAACGTACCCATCAAATCGATACCGTCTACTTGATAAAACAGGTACGATA
```

ACCAATGGGAAACCAGTAGTCACTGACTTTGATGGTGATGAAGAAGCTTTGCAATTATTA  
GCTAGCGCAGAAAAAGGTTCCAGAACATCCTTTAGCAGATGCCATTGTAAATTATGCCCAA  
ACGATGAATATTAATTATTAGATACAACCTGATTTTGAAGCGGTACCTGGGCGCGGTATT  
AAAGCAAATATATCTGGCAAAAATTTAATTGTTGGTAACCGTCAATTTATGAACGACGAA  
AATGTCGATATAAAAAGATTCCAGAAGACATCATGACTCAATTTGAAAAATCTGGTAAAAACA  
GCAATGTTAATTGCAATCAATCAAGAATATAGAGGGATGGTTGCCGTTGCAGATACAGTC  
AAAGACTCAACTGCTACTGCAATTAACAATTACATGATCTCAATATTAAGTCGTCATG  
TTAACCGGTGACAATGAACGTACAGCACAAGCTATTGCCAATGAAGTTGGTATCGATACA  
ATCATTGCCCAAGTATTACCAGAAGAAAAAGCAGCAAAAATCAAATCACTCCAAACCCAA  
GATAAAACCATTGCGATGGTGGGTGACGGCGTTAACGATGCACCAGCACTCGTACAAGCC  
GATATTGGTATTGCTATTGGTACTGGCACAGAAGTCGCTATTGAAGCCGAGATGTTACA  
ATTCTAGGCGGTGACTTATTATTAATACCTAAAGCCATTAAGGCAAGTAAAGCAACCATA  
CGCAATATTGCCAAAACCTTATTCTGGGCATTTGGTTATAATGTTGCAGGTATACCTATC  
GCCGCACTTGGTTTGTCTGCACCATGGATTGCTGGTGCAGCCATGGCTCTAAGTTCTGTT  
AGTGTAGTAACAAATGCGTTAAGATTAACCGTATGAAATTATAA

>copA\_BAB58719.1 Staphylococcus aureus subsp. aureus Mu50 copper-  
transporting ATPase

GTGGCTAATACGAAAAAACAACATTAGATATCACTGGTATGACTTGTGCCGCATGTTCA  
AATCGTATCGAAAAGAACTGAATAAACTTGATGACGTTAATGCCCAAGTGAATTTAACT  
ACAGAGAAAGCAACTGTTGAGTATAACCTGATCAACATGATGTCCAAGAATTTATTAAT  
ACGATTCAACATTTAGGTTACGGTGTCACTGTAGAACTGTGCAATTAGACATTACAGGT  
ATGACTTGTGCTGCATGCTCAAGCCGTTTGA AAAAGTGTTAAATAAAATGAACGGCGTT  
CAAAATGCAACGGTCAATTTAACAACAGAGCAAGCTAAAGTTGACTATTATCCTGAAGAA  
ACAGATGCTGATAAACTTGTCACTCGCATTCAAAAATTAGGTTATGACGCGTCTATTA  
GATAACAATAAAGATCAAACGTACGCAAAAGCTGAAGCGCTACAACATAAATTGATTAAG  
CTTATCATATCAGCAGTATTATCTTTACCACTATTAATGTTAATGTTTGTGCATCTTTTC  
AATATGCATATACCAGCACTATTTACGAATCCATGGTTCCAATTTATTTTAGCTACACCT  
GTACAATTTATTATTGGATGGCAATTTATGTAGGTGCTTATAAAAACCTAAGAAATGGT  
GGCGCCAATATGGATGACTTGTGCTGTTGGTACAAGTGCAGCATATTTTTACAGTATT  
TATGAAATGGTTCGTTGGCTAAATGGCTCAACAACGCAACCGCATTTATACTTTGAAACA  
AGCGCCGTACTACTTACCTTAATCTTATTCCGTAAGTATTTAGAAGCTAGAGCGAAGTCT  
CAAACAACCAATGCGCTTGGCGAATTATTAAGTTTACAAGCTAAAGAAGCACGCATTTTA  
AAAGATGGTAATGAAGTATGATTCTCTAAATGAAGTACATGTTGGAGATACACTTATC  
GTTAAACCAGGTGAAAAGATACCTGTTGATGGCAAATTTATTAAGGTATGACTGCCATC  
GACGAATCTATGTTAACAGGTGAATCTATCCCTGTTGAGAAGAATGTTGATGATACTGTA  
ATTGGTTCAACGATGAACAAAACGGTACTATTACTATGACAGCAACAAAAGTTGGCGGG  
GACTGCGTTGGCAAATATTATTAAGTTGTGCAAGAAGCTCAAAGTTCTAAAGCGCCG  
ATTCAACGATTGGCAGATATTATTTCTGGTTATTTCTGTTCTATCGTTGTTGGTATCGCA  
CTATTAATATTTATCGTGTGGATTACTTTAGTTACACCAGGTACATTTGAACCTGCACTT  
GTTGCGAGTATTTCCGTTCTTGTCAATTGCTTGTCCATGCGCATTAGGACTTGCTACACCA  
ACTTCTATTATGGTAGGTAAGTACTGGTCGCGTCTGAAAATGGCATTTTATTTAAAGGTGGC  
GAGTTTGTGAAACGCACACATCAAATTTGATACCATCGTTTTAGATAAGACGGGTACCATT  
ACAAATGGTCGTCCAGTCGTGACAGATTATCATGGTGACAATCAAACGCTACAACCTGCTT  
GCTACTGCTGAAAAAGATTCTGAACACCCATTGGCAGAAGCCATTGTCAATTATGCAAAA  
GAAAAGCAATTAACATTAACCTGAGACAACAACATTTAAAGCAGTACCTGGCCATGGTATT  
GAAGCAACGATTGATCATCACCATATATTGGTTGGTAACCGTAAATTAATGGCTGACAAT  
GATATTAGCTTGCTAAGCATATTTCTGATGATTTAACACATTATGAACGAGATGGTAAA  
ACTGCTATGCTCATCGCTGTTAATTATTCATTAACCTGGTATCATCGCAGTGGCAGATACT  
GTCAAAGATCATGCCAAAGATGCTATAAAAACAATTGCATGATATGGGCATTGAAGTTGCC  
ATGTTAACTGGCGATAATAAAAACACTGCTCAAGCCATTGCAAAAACAAGTAGGCATAGAT  
ACTGTTATTGCAGATATTTTACCAGAAGAAAAAGCTGCACAAATTGCGAAAACCTACAGCAA  
CAAGGTAAGAAGTTGCGATGGTTGGTACGGTGTAAATGATGCACCTGCATTAGTTAAA  
GCTGATATCGGTATCGCCATTGGTACAGGTACAGAAGTTGCCATTGAAGCAGCTGATATT  
ACTATTCTTGGTGGCGACTTGATGCTTATTCTAAAGCCATTTATGCAAGTAAAGCAACC

ATTCGTAATATTCGTCAAAATCTATTTTGGGCATTCGGCTATAATATTGCCGGTATCCCT  
ATAGCTGCATTGGGCTTACTTGCCCATGGGTTGCTGGTGCTGCAATGGCACTAAGTTCA  
GTAAGTGTGTACAAACGCACCTTAGATTGAAAAGATGCGATTAGAACCACGCCGTA  
GATGCCTAG

>mco\_AAQ17236.1 *Staphylococcus aureus* putative copper oxidase  
ATGTTTATGGTTCCTAATGATACTTTGGCAGAAGGTAAGCACACCATGATGGACATGAAA  
GAAAATGATCAAAAGCGAAATGATATGATGGATATGAAAAGTCATGACGAAAGAAAAAAT  
TTGAATTCTTACAAGGAAAAAATGAAATAACATTTCCCAAAGTTTTAGATCCTAAAAAA  
GATAACAATGGTTATAAAAGTTATACATTAAGCGCAGAAAGGAAAGACAGAATTTTAC  
AAAGGTAATTTCTAACACTTTAGGATACAATGGAAATTTACTTGGGCCAACTTTAAAA  
TTAAAAAAGGAGATAAGGTTAAATTAAGTTAGTCAACAACCTTAGATGAAAATACAACA  
TTTCATTGGCATGGGTTAGAAATAGATGGAAAAGTGGATGGAGGCCCTTCTCAAGTTATA  
AAACCAGGAAAAGAAAAACAATAAAATTTGAGGTTAAACAAGAGGCTGCTACATTATGG  
TATCATCCCCACCCCTCCCAAATACAGCTAAACAAGTTTATAATGGTTTATCAGGGTTA  
TTATATATAGAGGATGACAAAAAGAATAATTATCCTAGCAATTATGGGAAAAATGATTTG  
CCTATAATAATCCAAGATAAAACATTTGTATCTAAAAAATTAATTATACAAAAACGAAA  
GATGAAGATGGTACTCAAGGTGATACAGTCCTTGTGAATGGGAAAGTAGATCCTAAATTA  
ACAACAAAAGAAGGAAAAATACGTTTGAGACTTTTAAATGGCTCCAATGCTCGGGATTTA  
AATCTTAAGCTAAGTAATAATCAAAGTTTTGAATATATTGCTTCAGAAGGCGGCCATTTA  
GAAAAGACTAAAAGTTAAAAGAAATTAATTTAGCTCCTTCAGCAAGAAAAGAAATAGTA  
ATAGATTTATCTAAATGAAAGAAGACAAAGTCAATCTTGTTGATAATGATGAAACAGTA  
ATTTTACCAATTATTAACAAAGAAAAAAGTACTAACAAAGACACTACTCCAAAAGTAGAT  
AAAAAATCAAATTAGAAGGTATGGACGATAATGTTACTATTAATGGCAAAAAATTCGAT  
CCTAACAGAATAGATTTACACAAAAGGTAAACCGTAAAGAACTTGGGAAATTGAAAAC  
GTCAAAGATAAAATGAGTGGTATGAAGCACCCGTTCCATATCCACGGAACGCAATTTAAA  
GTTTTATCAGTGGATGGGAAGAAACCTTCAGAAGATATGAGAGGCAAAAAAGACGTTATA  
TCTCTGGAACCTGGACAAAAGCCAAAATAGAAGTGGTTTTTAAAAATACTGGGACATAC  
ATGTTCCATTGTACATACTTGAGCATGAAGATAATGGAATGATGGGACAAATAAAAGTA  
ACAAAATAA

>copB\_ENA|ABX28125|*Staphylococcus aureus* ABX28125.1\_USA300\_TCH1516  
P-ATPase superfamily P-type ATPase copper (Cu<sup>2+</sup>) transporter  
ATGAATCATTCCAATCAAATGCATCATGATAACCATGCCTCACATGATCATCATAGTGGC  
CATGCACATCATCATGGAAATTTAAAGTAAAGTTTTTTGTTTCATTAATTTTTGCAATA  
CCTATCATTCTTTTATCGCCACTGATGGGTGTTAACTTACCTTTTCAATTCACATTTCCA  
GGTTCTGAATGGGTAGTGTTAATATTAAGTACAATTTTATTCTTTTATGGTGGTAAACCG  
TTCTTGTCTGGTGGTAAAGATGAAATTGCTACAAAAAACCAGGCATGATGACCTTAGTT  
GCCCTAGGTATTTAGTAGCTTATATTTATAGCTTGTATGCTTTTTATATGAATAACTTT  
AGTAGTGCAACTGGTCATACAATGGACTTTTTTTGGGAATTAGCAACCTTAATTTTAATT  
ATGCTATTAGGACATTGGATAGAAATGAATGCTGTGCGAAATGCTGGAGATGCTTTAAAG  
AAAATGGCAGAACTGTTACCTAATAGTGCTATTAAGTTATGGATAATGGCCAACGCGAA  
GAAGTTAAAATATCAGACATCATGACTGATGATATCGTCGAAGTAAAAGCCGGAGAAAGC  
ATCCAACAGATGGTATTATCGTTCAAGGACAAACATCTATAGATGAATCCCTAGTCACT  
GGAGAATCTAAAAAAGTACAAAAAATCAAATGACAACGTCATCGGGGGTTCTATTAAT  
GGGTCTGGAACAATACAAGTCAAGGTTACAGCTGTGGGAGAAGATGGATATCTTTCTCAA  
GTTATGGGACTTGTTAATCAAGCACAAAATGATAAATCTAGTGCTGAATTGTTATCTGAT  
AAAGTAGCGGGTATTTATTCTACTTTGCTGTAAGTGTGGCGTGATTTCTTTTATTGTC  
TGGATGCTCATTCAAATGATGTTGATTTGCATTAGAACGCTTGTAACCTGTGTTAGTC  
ATTGCTTGTCCACATGCTTTAGGCTTGGCAATACCTTTAGTCACTGCACGTTCTACTTCA  
ATTGGTGACATAATGGTTTAAATTATTAATAAAGAGAGTCTGTAGAAATAGCTCAACAT  
ATCGATTATGTAATGATGGACAAAACCTGGTACTTTAACTGAGGGTAACTTTTCTGTGAAT  
CATTATGAGAGCTTTAAAAAATGATTTGAGTAATGATACAATATTAAGCCTTTTTCGCCTCA  
TTAGAAAAGTCAATCTAATCACCCATTAGCTATAAGTATTGTTGATTTTTCGAAAAGTAAA  
AATGTTTCACTTACTAACCCACAAGACGTTAATAATATTCCAGGTGTCGGATTAGAAGGT  
CTAATTGATAATAAAACATATAAAATAACAAATGTCTCTTATCTTGATAAACATAAACTT

AATTATGACGATGACTTGTTTACTAAATTAGCTCAACAAGGTAATTCATCAGTTATTTA  
ATTGAGGATCAACAAGTCATTGGCATGATTGCTCAAGGAGATCAAATTAAGAAAAGCTCA  
AAACAAATGGTAGCTGATTTACTATCAAGAAATATTACACCAGTCATGCTTACAGGTGAC  
AATAATGAAGTGGCACACGCTGTCGCAAAAGAATTAGGTATTAGTGATGTCCACGCACAA  
CTCATGCCAGAAGATAAGGAAAGCATTATAAAAGATTATCAAAGTGACGGTAATAAAGTC  
ATGATGGTCGGAGACGGTATCAACGATGCGCCGAGTCTTATAAGAGCGGATATTGGTATA  
GCAATTGGTGCAGGTACAGATGTTGCAGTGGATTGAGGTGATATCATACTTGTTAAAAGT  
AATCCATCAGATATCATTCAATTTCTTGACCCTTTCAAATAATACTATGAGAAAAATGGTG  
CAAACTTATGGTGGGGTGCAGGTTATAATATTGTTGCTGTACCTTTAGCAGCTGGTATT  
TTAGCATTTATTGGCTTGATTTTATCACCTGCAATAGGTGCTATTTTAATGTCTTTAAGT  
ACAATTATCGTTGCAATTAATGCCTTTACATTAATAAATTAATAA

>copB\_CAG39731.1 *Staphylococcus aureus* subsp. *aureus* MRSA252  
putative cation exporting ATPase protein

TTGTCGAATAACAAAAACACAAAATCATGAGCATCATAGTCATCAAGAACATGAAAAT  
CACACTAGTCATGGTAATCATGAACATCACCATCATGGAAATTTTAAAAGTAAATTCCTT  
ATTTCTTTGATTTTTGCGATACCGATTATTATTTTATCGCCCATGATGGGAGTTAAATTA  
CCGTTTCAAATTTCAATTTACAGGGTCAGATTGGATTGTATTAATTCCTTGCTACAATTTTA  
TTCTTTTACGGAGGAAAGCCATTTTTATCAGGGGCTAAAGATGAAATTTCAACTAAAAAA  
CCTGGAATGATGACGCTTGTGCTCTAGGTATTTAGTAGCTTATATTTATAGTTTATAC  
GCCTTTTATATGAATAACTTCAGTGGTTCATCCACACATACAATGGACTTTTTCTGGGAA  
TTAGCGACTTTAATTTAATCATGTTATTAGGTGATTGGATTGAAATGAACGCAGTAGGT  
AATGCAGGCAATGCACTGAAGAAAATGGCAGAATTTTACCTAATACTGCAGTGAAGCTG  
ATTGATAACAATCAACGAGAAGAAGTTAAAATATCAGATATTCATATTGACGATATTGTG  
GAAGTCAGAGCAGGCGAAAGTATACCCACAGACGGAATCATTGTTGAGGAGAAACATCA  
ATTGACGAATCATTAGTTACTGGCGAATCAAAAAAGTTTCATAAACTCATAATGATGAT  
GTTATTGGAGTTCAATTAATGGTTCAGGTACAGTACAAGTTAAAGTGACTGCTACGGGT  
GAAAATGGCTACCTATCTCAAGTTATGGGTCTTGTTAAACCAAGCTCAAAACGATAAGTCA  
AAAGCTGAACTCCTCTCTGATAAAGTCGCAGGTTATTTGTTTTACTTTGCAGTAAGTATT  
GGCCTGATTTCAATTTATCGTATGGATGCTTATTCAAACAACGTCGATTTGCACTTGAA  
CGGCTAGTAACCGTATTAGTCATTGCTTGCCACATGCATTAGGCTTGGCAATACCTTTA  
GTTACAGCACGTTCTACCTCTATAGGCGCACATAATGGTTAATCATTAAAAACAGAGAA  
TCTGTAGAAATCGCACAAATATTGATTACATCATGATGGATAAAACTGGGACACTAAT  
GAAGGTAACTTTTAGTGAATCACTATGAAAGTTTTACAGACGAGTTAAATAATGAAGAA  
ATATTGAGTCTATTTGCTTCATTAGAAAGTAATTCTAATCATCCACTTGCCACTGGTATT  
GTTGATTTTGCTAAAGGCAAAAATATTTTATATGCTACTCCTCAAGAAGTTAATAATATT  
CCAGGTGTAGGCTTAGAAGGCACAGTTGATAATAAAAACTCAAATAGTGAATGTTTCT  
TATCTCGATAAAAGCAATTTTGATTATAATAAAGAACAATTTACGAATCTCGCTCAACAA  
GGGAATTCTATTAGTTATCTAATTCATGACCGACAAGTTATTGGTATTATCGCACAAAGGC  
GATAAAATTAAGAAAGTTCAAACAATGGTTTTCGGATTTATTATCGAGAAACATTACG  
CCAGTCATGCTTACAGGCGATAATAAAGAAGTGGCACAAACAGTGGCTGAAGAATTAGGT  
ATTAGTGATGTCCACGCGCAATTGATGCCCGAAGATAAAGAAAGTATTATCCAAGATTAT  
CAAAGCAATGGTAGCAAAATCATGATGGTGGTGGTATCAATGATGCGCCAAGCCTT  
ATTAGAGCAGATATTGGTATGGCAATTGGCGCAGGGACAGATGTAGCTATTGAATCGGGG  
GATGTCATACTCGTTAAAAGTAATCCTTCTGATATTATCAATTTTTGTCCCTTTCAAAA  
AATACGATGAAAAAATGGTTCAAATTTATGGTGGGGCGCAGGATATAACGTGATTGCA  
GTTCTCTTGACGCTGGTATATTAGCTTCTATTGGTTAATATTATCACCTGCTGTGGGT  
GCAATACTTATGTCTTTAAGTACGATCATCGTAGCAATTAATGCATTTACATTAATAA  
AAATAA

>copZ\_Staphylococcus saprophyticus KS40\_03240 copZ Copper chaperone  
CopZ 346416:346622 reverse

ATGGCTACAGAAACAATTCAAGTAGAAGGCATGAGCTGTGACCATTGCAAACATGCTGTA  
GAAACTGCATTAAGTACGCTTGGTGGTATCAACAGCTGACGTTAGTCTAGAAGCCGGT  
AATGTTAAAGTAGATTTTGACGATGACAAAGTTACAATGCCTCAAATGAAAGACGCAATA  
GAAGACCAAGGTTACGATGTTAAATAA

>copZ\_Staphylococcus warneri\_CP032158.1  
TTGACTAACGAAGTTATTAATGTAGAAGGTATGAGCTGTGACCATTGCAAGCATTCAATTGAAAAAGC  
AT  
TAAATGGATTAGATGGTGTAAACATCTTCAGAAGTAAGCTTGGCGAATGGGAATGTGGAAGTTGAATTT  
GA  
TGAAAATCAAGTAGCTTTCAACGACTTTAAAGAAGCTATTGAAGATCAAGGTTACGATGTAATTAAT  
AA  
>copZSa\_CP006706.1  
ATGTCACAAGAAATTTTAAATGTTGAAGGTATGAGCTGTGGTCACTGCAAAAGTGCTGTTGAATCTGC  
AT  
TAAATAATATTGACGGTGTCACTTCAGCTGAAGTTAACCTTGAAAATGGTCAAGTAAGTGTTCATAT  
GA  
TGACAGTAAAGTTGCTGTATCTCAAATGAAAGACGCAATCGAAGATCAAGGTTACGATGTCGTTTAA  
>czrB\_Staphylococcus aureus\_CP006706.1  
ATGTCTCATTACATCATCATGACCATATGCATAGTCATGTAAC TACAATAATAAGAAAGTATTGTT  
TA  
TATCGTTTTTAATAATCGGTCTATATATGTTTATCGAAATCATCGGCGGTCTCCTTGCTAACAGCTTG  
GC  
ATTACTATCTGACGGTATCCATATGTTTAGCGACACATTCTCATTAGGTGTTGCTTTAATCGCATTTA  
TA  
TATGCAGAAAAGAACGCCACAGCTACGAAAACATTTGGTTATAAACGTTTCGAAGTACTCGCAGCGTT  
AT  
TTAATGGTGTAAACGCTTTTTGTAAATAAGTATTTTGATTGTTTTTGAAGCGATTAAACGCTTCTTTGTT  
CC  
TTCTGAAGTTCAATCAAAAGAAATGTTAATCATTAGCATTATTGGTTAATTGTCAATATCGTTGTTG  
CA  
TTCTTTATGTTTAAAGGCGGTGACACGTCACACAATTTAAATATGCGTGGCGCTTTTCTACATGTTAT  
CG  
GAGACTTATTAGGTT CAGTTGGCGCCATTACTGCAGCTATTTTAATTTGGGCATTTGGATGGACAATC  
GC  
CGATCCTATCGCAAGTATTTTGGTTTCCGTTATTATTTTAAAAAGTGCTTGGGGTATCACAAAATCTT  
CA  
ATTAACATTTTAAATGGAAGGCACACCAAGTGATGTTGATATAGATGAAGTTATAACTACTATTA AAAA  
GG  
ATTCACGAATACAAAGTGTGCATGATTGCCATGTTTGGACAATTTCAAATGATATGAATGCATTAAGT  
TG  
TCATGTTGTTGTAGACCATACATTGACAATGAAAGAATGTGAATTATTATTAGAAAACATTGAGCATG  
AT  
TTATTACATTTAAATATCCACCATATGACTATTCAATTAGAAACGCCTAATCACAAACATGATGAATC  
GA  
TGATATGTT CAGGAACACATAGTCATTACATAACCATCATGCTCATCATCACGCGCATGTACATTAA  
>copB\_Staphylococcus sciuri\_KX982172.1  
ATGTTATACTCAAATTGTCTTATTACTATCTTTAAAAATATAAAATTAGGAGGTTTAATTTTGTGCAA  
TA  
ACAAAAACACCAAAATCATAAGCATCATAGTCATCAAGAACATGAAAATCACACTAGTCATGGTAAT  
CA  
TGAACATCACCATCATGGAAATTTTAAAAGTAAATTCCTTATTTCTTTGATTTTTGCGATACCGATTA  
TT  
ATTTTATCGCCATGATGGGAGTTAAATTACCGTTTCAAATTTCAATTTACAGGGTCAGATTGGATTGT  
AT  
TAATTCCTTGCTACAATTTTATTCTTTTACGGAGGAAAGCCATTTTATCAGGGGCTAAAGATGAAATT  
TC  
AACTAAAAACCTGGAATGATGACGCTTGTGCTCTAGGTATTT CAGTAGCTTATATTTATAGTTTAT  
AC

GCCTTTTATATGAATAACTTCAGTGGTTCATCCACACATACAATGGACTTTTTCTGGGAATTAGCGAC  
TT  
TAATTTTAATCATGTTATTAGGTCATTGGATTGAAATGAACGCAGTAGGTAATGCAGGCAATGCACTG  
AA  
GAAAATGGCAGAACTTTTACCTAATACTGCAGTGAAGCTGATTGATAACAATCAACGAGAAGAAGTTA  
AA  
ATATCAGATATTCATATTGACGATATTGTGGAAGTCAGAGCAGGCGAAAGTATACCCACAGACGGAAT  
CA  
TTGTTCAAGGAGAAACATCAATTGACGAATCATTAGTTACTGGCGAATCAAAAAAGTTCATAAACT  
CA  
TAATGATGATGTTATTGGAGGTTCAATTAATGGTTCAGGTACAGTACAAGTTAAAGTGACTGCTACGG  
GT  
GAAAATGGCTACCTATCTCAAGTTATGGGTCTTGTTAACCAAGCTCAAAACGATAAGTCAAAAGCTGA  
AC  
TCCTCTCTGATAAAGTCGCAGGTTATTTGTTTTACTTTGCAGTAGGTATTGGCCTGATTTCAATTTATT  
GT  
ATGGATGCTTATTCAAAACAACGTCGATTTTCGCACTTGAACGGCTAGTAACCGTATTAGTCATTGCTT  
GT  
CCACATGCATTAGGCTTGGCAATACCTTTAGTTACAGCACGTTCTACCTCTATAGGCGCACATAATGG  
TT  
TAATCATTAAAAACAGAGAATCTGTAGAAATAGCACAAACACATTGATTACATCATGATGGATAAACT  
GG  
GACACTTACTGAAGGTAACCTTTTCAGTGAATCACTATGAAAGTTTTACGAACGAGCTAAATAATGAAG  
AA  
ATATTGAGTCTATTTACTTCATTAGAAAGTAACTCTAATCATCCACTTGCCACTGGTATTGTTGATTT  
TG  
CTAAAGGCAAAAATATTTTCATATGCTACTCCTCAAGAAGTTAATAATATTCCAGGTGTAGGATTAGAA  
GG  
CACAGTTGATAATAAAAACTCAAAATAGTGAATGTTTCTTATCTCGATAAAAGCAATTTTGATTATA  
AT  
AAAGAACAATTTACGAATCTCGCTCAACAAGGGAATTCTATTAGTTATCTAATTCATGACCGACAAGT  
TA  
TTGGTATTATCGCACAAAGGCGACAAAATTAAGAAAGTTCAAAACAATGGTTTCGGATTTATTATCG  
AG  
AAACATTACGCCAGTCATGCTTACAGGCGATAATAAAGAAGTGGCACAAACAGTGGCTGAAGAATTAG  
GT  
ATTAGTGATGTCCACGCGCAATTGATGCCCGAAGATAAAGAAAGTATTATCCAAGATTATCAAAGCAA  
TG  
GTAGCAAAATCATGATGGTTGGTGTATCAATGATGCGCCAAGCCTTATTAGAGCAGATATTGGT  
AT  
GGCAATTGGCGCAGGGACAGATGTAGCTGTTGAATCGGGGATGTCATACTCGTTAAAAGTAATCCTT  
CT  
GATATTATCAATTTTTTTGTCCCTTTCAAAAAATACGATGAAAAAATGGTTCAAATTTATGGTGGGG  
CG  
CAGGATATAACGTGATTGCAGTTCCTCTTGCAGCTGGTATATTAGCTTCTATTGGTTTAATATTATCA  
CC  
TGCTGTGGGTGCAATACTTATGTCTTTAAGTACGATCATCGTAGCAATTAATGCATTTACATTA  
TA  
AAATAA

>arsC\_Staphylococcus aureus AAA25638.1 Plasmid pI258 arsenate reductase

ATGGATAAGAAAACAATTTATTTTATATGTACAGGAACTCTTGTCGTAGCCAAATGGCT  
GAAGGTTGGGGAAAGGAAATATTGGGTGAAGGTTGGAATGTCTATTCTGCTGGTATTGAA  
ACACATGGTGTTAATCCTAAAGCAATAGAAGCTATGAAAGAAGTAGATATTGATATATCA

AACCATACGTCAGACTTGATTGATAATGATATTTTAAAACAATCAGATTTGGTCGTAACG  
TTATGTAGTGATGCAGACAATAATTGTCCTATTTTACCACCAAACGTTAAAAAAGAGCAT  
TGGGGTTTTGATGATCCAGCAGGTAAGAATGGTCAGAATCCAACGTGTTAGAGACGAG  
ATTAATTAGCTATAGAAAAGTTTAAATTGAGATAA

>arsC2\_BAE19605.1 *Staphylococcus saprophyticus*

ATGGATAAGAAAACAATTTACTTTATATGTACTGGTAATCCTTGTCGTAGTCAAATGGCT  
GAGGGCTGGGGAAGAGAAATACTCGGCGAAGAATGGAATGTTTACTCAGCAGGTATCGAA  
ACGCATGGCGTAAATCCTAAGGCGATAGAAGCTATGAAAGAAGTGGATATTGACATATCA  
AACCATACTTCTGATTTAATTGATAATAAAAATTTAAGACAATCAGACCTAGTTGTTACA  
CTTTGTAGTGATGCTGATGAGAATTGTCCAGTCATCCCGCCTAATGTAAAAAAGAACAT  
TGGGGCTTTGATGACCCAGCAGGTAATCTTGGTCAGAATTTCAACGTGTAAGAGATGAA  
ATAGGTCAAAGATCAAGCAATTTTATGATAATTA

>copC\_KYH13369.1 *Staphylococcus saprophyticus*

GTGAATGGAGGCTTAAAAGTGTCTATAAAAAGTAACTTTTTTATAAAGTTATATTTAGTA  
TTTTTTGTAGCGTTAATTTGTTTAAACAGTATTTTCAACGCAAACGCATCGGCGCATGCG  
ACACTTGAAAAAGTAACGCCTCAAGAAAACAGTACTGTTAAGTCGCAACCTAAACAGATA  
TCATTACAATTTAATGAGCCTGTTAATACGAAATACTCTAGTATTACTATTTTTGACGAT  
AGTGGTAATGAGCTTGATAATGTTAAACCTAATACCACAGGGCATAATAAAACACTGGAC  
TTTGATGTTAATCATTTAAAAAAGGGAACCTATAAAATTAATGGCATGCCATTTAGCT  
GATGGTCACGAAGGCGGGAACCAATTTGAATTTTCTATTGGTAAAAAACAGCTAATAAT  
GTAGATAACAACCCGCTTTTTTGAACCTGCAGCATTCTGGTTTGGCTTTTTACGCTTT  
TTAGCTGAAGGCTCCATCATCGTGCTCATAGGTCTTTTCTTAGTTAATCAAATGGCTATT  
AAAAAAGTTTTGCCGAATTTAATATCATTCTAAATACCGTTCTGCAATTTGGATGATT  
ATTGGCGTAACATTTATGACGTGTTAGTTATTTGATGTCGCTTACTTCAGATGTAAGT  
AGTGAGATATTAACCTTAAATATAGAGACGTTACTGCAAGTACCTTTATTATTATCATT  
TTAGGTATTATTGTTCTGCTTATTTTGTAGCTTAAAAAATATGTTAGCTAGCTGGTAC  
ATACTGATTGCGCTTATTATATTAGTCGTATTGAGCATGTCGGGTATGCTTTTGCACAG  
CAATTTCCAGTATGGTCCATCATCATACGTACAATACATTTAGTCGGTATGTCGATTTGG  
TTAGGTGCATTAGTTTATCTATTTTGTGTAACGCTAAATAACAAAGTCAATCAGCTAACG  
AATATTA AAAACTTTTTATTAACAGTAAATAGTATCGCCGCTTGATGATTATTGTATCA  
GGTGTGTTAATGGTAATTGATGAATCAAGCATATTAATGTATTTAATCATCTTCAAACG  
TGGTCGATGCTAGTTATTGTTAAAGTCGCAGGAGTTATTGCGATGATGTGTCTTGGCGCT  
TATCAGACAACGCGTGCATTAAGCCGTCAATATACAAATAAATCAATGTTATCAATAGAA  
ATAATTATAGGTCTCGTACTCATAGTTGCAGGATTATTATGAGTCAAATTAATATACCA  
AGTTAA

>arsA\_CBW54962.1 *Staphylococcus saprophyticus*

GTGGTGGAGATGGATGCTGTTAATACTTAAATAAATTGAATTTAGATAATGTTGAGTTA  
ACAAAATATTTGTTTTTACTGGTAAAGGTGGCGTAGGCAAACGACGATATCAAGTTCT  
ATTGCTTTAACTTAGCAGAGAATGGAAAGAAAGTAGCTTTAGTAAGTACTGATCCAGCT  
AGTAATTTACAAGATGATTTCAAATGGAATTATCTAATAAATTAACATACATATCAACCT  
ATACCTAATCTCTATAGCCAATTTTGACCCGATTGCTGCTGCAGACGATTATAAAGCA  
CAAGCTATAGAACCTTATGAGGGTATTCTACCAGAAGATGTGCTTTCTGAGATGAAAGAA  
CAGTTAAGTGGTTCGTGTACAGTTGAAGTAGCAGCATTTAATGAATTTACAAATTTTTTA  
TCCGATAAAAACCTTTAGAACAAGAATTTGATTTTATTATATTTGATACAGCTCCAACAGGT  
CACACCTTGAGAATGCTTGAATTACCTTCTGCATGGACAGATTATTTAAATACAACGAGT  
AATGACGCTTCTTGCTTAGGTCAATTATCGGGTTTAAATGAAAATAGAGGTAAATATAAT  
TCAGCACTTGAAAACTACGTAACCAAGACGATACGACCATGATCTTAGTTGCCAAACCT  
AACCCTTCTATATATGAAATCAAAGAGCGCAACAAGAATTACAACAACCTATCAATT  
TCTAAATCAAAGTAATCATTAACTATATAGAAGAAAGTACGGTTTAAATTTCTAAT  
CAAATGAAATTAGAACAAGATAAAAAACATTAACCTTTTAAATGAATGGTTAAATAACAAT  
CATGCCTTTTACGTTCCATATAAAAAGCAGAAAGCAGAAGGTATAGAAAGTTTATCTAAT  
CTATTAATGATGATAATTTAATTGAAAATGATAACTTTATTGTTGAAGACCATCCACAA  
TTCAATAAATTAATAGATGAGATTGAAAATAGTGAAGTACAGTATTTATTTACAATGGGA  
AAAGGTGGCGTTGGTAAAACGACAGTAGCAACGCAATTAGCTACAGCATTATCTAATAAA

GGACATCGTATTCTTTTAGCAACGACTGACCCTACTAAAGAAATTAATGTTGAAACCACA  
AGTAATTTAAATACTGCTTATATTGATGAAGAACAAGCATTAGAAAAGTATAAAAAAGAA  
ATACTAGCCACAGTGAATGATGATACACCACAAGACGATATTGATTATATTGTGGAAGAT  
TTAAAATCACCTTGACAGAAGAAATAGCATTTTTTCAAAGCCTTAGTGACATTATGGAG  
AATCAAGAAGACATGGATTACGTAATTGTAGATACAGCTCCTACAGGCCATACCTTGCTG  
TTACTTGATTCTAGTGAAAATCATCATAAAGAACTAAAGAAAAAATCAACTCAAACCTACC  
AGTAATGTTGAAACATTATTACCCAAAATTCAAATAAAAAATTTAACACAGATGATAATC  
GTAACACTAGCAGAAAAAACACCTTATTTAGAATCTAAACGTTTAGTAGAAGATTTAAAT  
AGAGCTAATATAGGCCATAATTGGTGGGTGTTAATCAATCGTTAGTTACGCTAAATCAA  
CGTGATGACCTTTTTAGTAACAAAAAGAAGATGAATCAATTTGGATAAACAAGATTTAAA  
AATGAAAGTCTTGATAATTATTTGTCATACCTTATGGAGGGTTATCATAA

>arsB\_CBW54959.1 *Staphylococcus saprophyticus*

ATGATGATATTAGCAATCACAATATTTGTATTAACGTTAATTTTTGTTATATGGCAACCT  
AAAGGCTAGATATTGGTATTACTGCATTAATTGGTGTCTAGTTGCTATAATCACTGGC  
GTTGTAAGCTTTTCAGATGACTAGAAGTTACTGGAATTGTTTGAATGCGACCTTAACT  
TTTGTGTCAGTTATTCTTATTTCACTCATATTAGATGAAATTGGGTTCTTTGAATGGTCT  
GCTATACATATGGTGTAGAGCATCAAAAGGTAGCGGATTGAAAATGTTTATCTTTATCATG  
CTATTAGTTTCAGTTGTAGCAGCCTTCTTCGCAAATGATGGTGCAGCTTTAATACTGACG  
CCTATTGTTTTAGCAATGGTACGTAGTCTAGGTTTTGATAAAAAAGCGATATTTCCATTT  
ATTATTGCTAGTGGTTTTATTGCAGATACCACATCATTACCACTTATTGTTAGTAATTTA  
GTTAATATTGTTTCTGCTGATTACTTTGATATTGGATTTGTTGAGTACTTCAGTAAATG  
ATTATACCTAATATATTCTCTCTGATTGCTAGTATTCTCGTCTTATGGTTATATTTTAGA  
AAGTCTATCCAGGAAAAATTTGATGCAGTAAATATTAGAGAACCAAAGAAGCGATTAAG  
GACAAAAAGCTTTTTAACATCTCGTGGATTGACTCACTGTATTGCTAGTTGGTTATTTA  
ATAAGTGAATTTATAAATATTCCAGTATCAATTATTGCTGGTATCATTGCTTTAATATTT  
GTATTATTAGCGCGTAAATCTAAAGCCGTGCATACGAAACAAGTAATTAAGGTGCGCCA  
TGGAATATTGTTTTATTCTTATTGGTATGTATCTCGTCGTATTTGGTTTGAAAAACGTG  
GGCATTACAACACTTCTTGGTGTACTAACAACATTTCAAGTTATGGCTTATTTAGC  
AGCATTATGGGTATGGGCTTTGTAGCTGCATTCCTATCCTCTATTATGAATAACATGCCA  
ACCGTTTTAATAGATGCAATAGCAATTGGTCAATCGAGTGCTACAGGAATATTAAGAA  
GGTATGATTTATGCGAATATTATCGGATCTGATTTGGGGCCTAAGATAACACCAATTGGT  
TCGTTAGCCACACTTCTTTGGTTACACGTAACCTCAAAGGTGTCAAGATTTCTTGG  
GGAACCTATTTAAGACCGGAATTATTATCACAATCCCTGTTTTATTTGTAACCTATTA  
GGTCTATATTTAACACTAATAATTTTTTAA

>arsB\_Staphylococcus saprophyticus KS40\_00710 arsB\_1 Arsenical pump  
membrane protein 76231:77520 reverse

ATGACAATATTAGCAATTGTGATTTTTCTTTAACTTTAACCTTTGTGATATGGCAACCG  
AAAGGTTTAAATATTGGTATTACAGCTTTAATTGGAGCTGTCGTTGCTATCATTACGGGA  
GTCGTAAGTTTTTCCGATGTATTAGAAGTAACAGGTATTGTTTGAATGCTACTTTAACA  
TTTGTAGCTGTTATTCTTATTTCAATATTAGATGAAATTGGATTTTTTGAATGGTCT  
GCGATACATATGGTCAAGGCTTCAAACGGTAATGGATTAATAATGTTTGTGTTTTCATCATG  
CTATTAGTTTCAGTTGTAGCAGCCTTCTTCGCAAATGATGGTGCAGCTTTAATACTGACG  
CCTATTGTTTTAGCAATGGTACGTAGTCTAGGTTTTGATAAAAAAGCGATATTTCCATTT  
ATTATTGCTAGTGGTTTTATTGCAGATACCACATCATTACCACTTATTGTTAGTAATTTA  
GTTAATATTGTTTCTGCAGATTACTTTGATATTGGGTTTGTGAGTATTTTAGTCGAATG  
ATTATTCCTAATATATTCTTTAATCGCAAGTATTCTTGTCTTATGGCTTTATTTTAGA  
AAGTCTATCCAGGAAAAATTTGATGCAGTAAATATTAGAGAACCAAAGAAGCGATTAAG  
GACAAAAAGCTTTTTAACATCTCGTGGATTGACTCACTGTATTGCTAGTTGGTTATTTA  
ATAAGTGAATTTATAAATATTCCAGTATCAATTATTGCTGGTATCATTGCTTTAATATTT  
GTATTATTAGCACGTAATCTAAGGCTGTTCATACGAAACAAGTAATTAAGGTGACCA  
TGGAATATTGTTTTATTCTTATTGGTATGTACCTTGTGGTATTTGGTCTAAAAAATGTG  
GGCATTACAACGCTTCTTGGTGTACTAACAACATTTCAAGTTACGGCTTATTTAGT  
AGTATCATGGGCATGGGTTTTATAGCTGCATTCCTTTTCATCTATTATGAACAACATGCCA  
ACTGTTTTAATAGATGCAATAGCGATTGGTCAATCTCAAACAACAGGCATACTCAAGGAA



GGTATGATTTATGCGAATGTTATCGGATCTGATTTAGGACCTAAAATAACACCCATTGGT  
TCGTTAGCAACACTTCTCTGGTTACATGTACTTACTCAAAAAGGTGTTAAAATTTCTTGG  
GGAACATACTTTAAACCGGTATTATTATAACGATTCCAGTATTATTTATTACACTCTTA  
GGTTTATACCTTACACTAATTATATTTTAA

>arsB\_Staphylococcus aureus\_ENA|AAA25637|AAA25637.1 Plasmid pI258  
arsenic efflux pump protein

ATGACTATTTTAGCAATTGTAATTTTTCTTTAACTTTAACCTTTGTGATTGGCAACCA  
AAAGTTTAGATATTGGTATTACAGCTTTAATTGGAGCTGTTGTTGCTATCATTACAGGA  
GTCGTAAGTCTTTCTGATGTATTAGAAGTAACAGGTATTGTTTGAATGCAACTTTAACT  
TTTGTGGCTGTTATTCTTATTTTCAATATTAGATGAAATTGGTTTTTTTTGAATGGTCT  
GCGATACATATGGTCAAGGCTTCAAACGGTAATGGCTTAAAAATGTTTGTTTTTATTATG  
TTACTTGGGGCAATTGTAGCAGCATTTTTCGCAAATGATGGTGCAGCTTTAATCTTAACG  
CCTATTGTATTAGCTATGGTAAGGAATCTAGGATTTAATCAAAAAGTGATTTTCCCCTTT  
ATTATTGCCAGTGGTTTTATTGCTGATACTACATCACTTCCCTTAATTGTAAGTAACTTA  
GTTAATATCGTTTCTGCAGATTACTTCGATATTGGATTTATTGAATATTTTAGCCGAATG  
ATCATTCCATAATATATTCTCTCTGATTGCTAGTATTCTCGTTTTATGGTTATATTTCAGA  
AAATCCATACCTAAAACGTTTCGATACAGAAAATCTATCAGATCCTAAAAGTGCAATTTAA  
GATTCTAAGTTATTTAAGCTTTCATGGATAGTATTAGCAGTACTACTCGTTGGATATCTT  
GTTAGCGAGTTTATCCAAATTCCTGTATCAATTATTGCTGGTATTATTGCTTTTTATCTTT  
GTAATATTAGCTCGTAAATCTAAAGCAGTTCATACAAAACAAGTGATTAAGGTGCACCA  
TGGAATATCGTTGTATTCTCTATTGGTATGTATCTTGTGTGTTTGGACTAAAAATGTA  
GGTATTACAACGATCCTTGGGGATGTTTTAACAAACATTTCAAATTATGGGTTATTTAGC  
AGCATCATGGGTATGGGCTTTATAGCTGCTTTCTTATCTTCGATTATGAACAACATGCCA  
ACTGTTTTAATAGATGCAATAGCGATTGGCCAATCCAGTGCTACAGGAATATTTAAAGAA  
GGCATGTTTTATGCGAATGTCATAGTTTCTGATTTAGGACCTAAAATTACGCCAATTGGT  
TCTTTAGCAACATTATTGTGGCTACATGTCTTAACACAAAAAGGTGTGAAGATTTCTGG  
GGAACATACTTTAAACTGGAATTATCATCACTATTCCAGTCCTATTTGTAACACTCTTA  
GGTTTATACCTTACACTAATCATATTTTAA

>arsB\_BAB57936.1 Staphylococcus aureus subsp. aureus Mu50 aesenical  
pump membrane protein homolog

ATGATGACAACCTTAGCGACACTCATTTTTCTAGTAACTTTATTATTTGTATTATGGCAA  
CCTAAAGGCCTAGATATTGGCATTACCGCATTAACTGGTGCCTTTATTGCTGTTATTACT  
GGTGTGTAAGTTTTTCCGATGTTTTCGAAGTAACAGGTATTGTTTGAATGCTACTTTG  
ACTTTTGTCTCAGTCATTCTTATTTCAATATTAGATAAAGTTGGATTATTGCAATGG  
TCAGCTATTCACATGCTTCATGCTTCAAAGGAAATGGTTTAAAAATGTTTCGTTTATATC  
ATATTATTGGGTGCCATTGTTGCTGCATTTTTCGCAAATGATGGCGCAGCGTTAATCTTA  
ACGCCATTGTATTAGCGATGGTTAAAAATATAGGTTTTAGTAAGCGGGCCATATCCCT  
TTTATTATTGCGAGTGGTTTTATAGCTGACACAACCTTCTTTACCTTTGATCGTGAGCAAT  
CTAGTGAATATTATATCTGCTGATTATTTTCATGTAGGATTCGTTTCGATATTTTAGTAGA  
ATGATTATACCTAATTTATTCTCGCTTTTAGCAAGTATTATAGTATTGTGGTTATATTTT  
AGAAAGGCGATACCTAAAACGTTTGATGATAATAATATAAAGCATCCTAAAGATGCCATT  
AATGATTTAAAGCTATTTAAAATTTTCATGGATTGTTCTAGTTATATTACTTTTTCGGCTAT  
CTAATCAGTGAATTTACTAAAATTCGGTATCAATTTTCACTGGAATCATTGCTTTTTATT  
TTTCTAATGTTGGCTCGTAAATCAAATGCTGTAATATTAAGCAAGTCATTAAGGGCGCA  
CCTTGGAAATATAGTATTATTTCAATTGGTATGTATATCGTCGATTTCGGCTTAAGAAAT  
GCTGGCATTACTTTAATATTGGCTAAAATATTAGAATATATTTCCAATTACGGTCTATTT  
AGCACCATTTTGGGAATGGGCTTCATTTACAGCGTTTTTATCATCAATAATGAATAATATG  
CCTACAGTTTTAATAGATGCGATTGCTATTGGTCAATCAAATGTCCATGGCATGTTAAAA  
GAAGGCCTAATTTATGCGAATGTTATCGGTTCTGATTTAGGTCCAAAAATTACACCGATA  
GGCTCTTTAGCTACACTTGTGGTTACACGTCTTAACACAAAAAGATGTTAAGATTTCT  
TGGGGCACATACTTTAAACTGGTATCATCATTACAATTCCAGTACTATTTATAACCCTC  
ATAGGGTTGTATCTAACACTTATCATATTTTAA

>arsB1\_SCS60557.1 Staphylococcus saprophyticus

ATGACAATATTAGCAATTACAATCTTCTTGTTAACATTAATCTTTGTCATATGGCAACCA

AAAGGGTTAGATATTGGCGTTACAGCATTTCATTGGTGCCATTATTGCCATCATCACTGGC  
GTGGTTTCCTTTGCTGATGTCATAGAAGTTACAGGCATTGTATGGAATGTCACACTCAG  
TTTGTAGCCGTAATACTGATTTTCGCTAATATTAGATGAAATTGGTTTCTTTGAATGGTCA  
GCCAGACACATGGTGAGCGCATCCAAAGGTAATGGATTGAAAATGTTATTTTTATTATG  
CTTTTAGGTTTCGGTAGTAGCAGCATTTCGCAAATGATGGTGCCGCATTAATACTAACG  
CCGATAGTTCTGGCAATGGTCAGAAATTTAGGATTTAATCAAAAAGTGATTTTCCCATTT  
ATTATTGCCAGTGGTTTTATTGCCGATACAACATCATTGCCATTAATTGTAAGTAATTTA  
GTCAATATTGTATCAGCGGATTACTTTGATATTGGATTTGTAGAATATTTGAGTCGTATG  
TTCATACCAAATATATTCTCACTGATAGCAAGTATTGTTGTATTATGGCTATATTTAGA  
AATTCTATTCCTAAAACATTTGATACCAATGATATTGCATCGCCAAAAGTGCCATAAAG  
GATGAAAACTCTTTAACTTTCTTGGATTGTCTTAGGTATATTACTTATTGGTTATCTT  
ATTAGTGAATTTATCCAAATCCCAGTATCTATCATTGCTGGACTAGTTGCACTCATTTTT  
GTCGTATTAGCACGCAAAACACCTGCAGTACATACGAAACAAGTGATTAAGGCGCACCT  
TGGAATATTGTTGTATTTCAATTGGTATGTATTTAGTTGTATTTGGATTGAAAAATGTA  
GGTATTACTTCCGTTTTAGCAGATTTACTATCACATATTTCAAATTATGGCTTATTTAGT  
AGTGTGTTAGGTATGGGCTTTATGGCTGCAATTTTATCATCTATCATGAATAATATGCCT  
ACAGTGTTAATTGATGCGATAGCGATAGGTCAATCACACGCTGTTGGGAGCATTAAAGAA  
GGTATGATATATGCGAACGTGATAGGCTCAGATTTAGGTCCTAAGATTACACCGATAGGT  
TCATTGGCTACATTACTCTGGTTACATGCTAGCTCAAAAAGGTGTGAAAATATCATGG  
GGTACTTATTTTAAAACAGGTATCATTATCACGATTCCAGTGTTATTATTCACATTGATT  
GGATTATACCTAACCTTATAATTTTTTAA

>arsB2\_SCT15039.1 *Staphylococcus saprophyticus*

ATGACCATTTTAGCAATTGTAATTTTTCTTTAACTTTAATCTTTGTAATATGGCAACCG  
AAAGGTTTAGATATTGGTATTACAGCTTTAATTGGAGCTGTTGTTGCTATCATTACGGGA  
GTCGTAAGTTTTTCCGATGTATTAGAAGTAACAGGTATTGTTTGGAAATGCTACCTTAACA  
TTTGTAGCTGTTATTCTTATTTTCAATTAATATTAGATGAGATTGGATTTTTTTGAATGGTCT  
GCGATACATATGGTCAAGGCTTCAAACGGTAATGGCTTAAAAATGTTTGTTTTTATCATG  
ATATTAGGGGCAATTGTAGCAGCATTTCGCAAATGATGGTGCAAGCTTTAATCTTAACT  
CCTATTGTATTAGCAATGGTAAGAAATCTAGGTTTTAATAAAAAAGTGATTTTTCTTTT  
ATTATTGCTAGTGGTTTTATTGCTGATACTACATCACTACCTTTAATCGTAAGTAACCTA  
GTTAATATCGTTTCTGCAGATTACTTCGATATTGGATTTATTGAATATTTTCAAGTCGCATG  
ATTATCCCAACATATTCTCTCTGATTGCTAGTATTCTCGTTTTATGGTTATATTTCAGA  
AAATCTATACCTAAAACGTTCAATACAGAAAATCTTTCAGACCCTAAAAATGTAATCAAA  
GATCCTAAATTATTTAAGCTTTCATGGATTGTATTAGCAATACTACTTGTGGGATATCTT  
GTTAGTGAGTTTATACAAATACCTGTATCAATCATTGCTGGTATCATTGCTCTTATCTTT  
GTAATATTAGCTCGTAAATCTAAAGCAGTTCATACAAAACAAGTAATTAAGGCGCACCA  
TGGAATATTGTTGTATTCTCTATTGGTATGTATCTTGTGGTATTTGGTCTAAAAAATGTG  
GGCATCACACGCTTCTTGGTGTACTAACAATATTTCAAATTACGGCTTATTTAGT  
AGTATCATGGGCATGGGCTTTATAGCTGCATTCCTTTTATCCATTATGAACAACATGCCA  
ACTGTTTTAATAGATGCAATAGCGATTGGTCAATCCAGTGTTACAGGAATATTAAGAA  
GGTATGGTTTATGCGAATGTCATAGGTTCTGATTTAGGACCTAAAATTACGCCAATTGGT  
TCTTTAGCAACATTATTGTGGCTACATGCTTAAACACAAAAAGGTGTGAAGATTTTATGG  
GGAACATACTTTAAAACGGAATTATCATTACTATTCCAGTCCTATTTGTAACACTCTTA  
GGTTTATACCTTACCTAATCATATTTTAA

>arsC\_KYH13884.1 *Staphylococcus saprophyticus* arsenate reductase

ATGGATAAGAAAACAATTTATTTTATATGTACAGGAAACTCTTGTCGTAGCCAAATGGCT  
GAAGGTTGGGGAAAAGAAATATTGGGTGAAGATTGGAATGTCTATTCTGCTGGTATTGAA  
ACACATGGTGTAAATCCTAAAGCAATAGAAGCTATGAAAGAAGTGATATTGATATCTCA  
AACCATACATCAGATTTGATTGATAGTGATATCTTAGAACAGTCAGCTTTGGTCTGTAACA  
TTATGTAGTGATGCAGACGATAATTGCCCTATATTACCACCTAATGTTAAAAAAGAACAC  
TGGGGCTTTGATGATCCAGCAGGAAAAGAATGGCCAGAATTTCAACGTGTTAGAGATGAA  
ATTGAAAAAGAATACAAGAATTCAAAGAAAACGCTCGTTTTAA

>arsC\_CBW54958.1 *Staphylococcus saprophyticus* subsp. *saprophyticus*  
MS1146

ATGGATAAGAAAACAATTTACTTTATATGTACTGGTAATTCTTGTCGTAGTCAAATGGCT  
GAGGGCTGGGGAAGAGAAATACTCGGCGAAGAATGGAATGTTTACTCAGCAGGTATCGAA  
ACGCATGGCGTAAATCCTAAGGCGATAGAAGCTATGAAAGAAGTGGATATTGACATATCA  
AACCATACTTCTGATTTAATTGATAATAAAATTTAAGACAATCAGACCTAGTTGTTACA  
CTTTGTAGTGATGCTGATGAGAATTGTCCAGTCATCCCGCCTAATGTAAAAAAGAACAT  
TGGGGCTTTGATGACCCAGCAGGTAAATCTTGGTCAGAATTTCAACGTGTAAGAGATGAA  
ATAGGTCAAAAGATCAAGCAATTTTATGATAATTAA

>cadA\_CBW54955.1 *Staphylococcus saprophyticus*

ATGAACGTCTATCGGGTCCAAGGATTTTCATGTGCAAATTGTGCAGGAAAGTTTGAGAAA  
AATGTTAAAAAGATTCCAGGCGTTTCAGGACGCAAAAGTAAATTTTGGAGCTTCAAAAATT  
GATGTCTTCGGCAGTGAACCTGTTGAAGAACTAGAAAAGGCTGGTGCTTTTGA AAAATCTT  
AAAGTGGCACCAGAGAAAACCTAAAAGACGGGTAGAACCTGTGGTAATTAAGATAAAAAC  
GTTTACCGTGTGGAAGGATTTTCTGCGCAAATTGTGCGGGGAAGTTTGAAAAAATGTA  
AAACAAATAGCTGGAGTTGAGGATGCAAAAGTAACTTTGGCGCTTCTAAAATTGATGTA  
TATGGAAATGCATCGGTTGAAGAACTTGA AAAAGCAGGTGCTTTTGAGAATCTAAAAGTA  
TCTCCTGAAAAACTAGCGAATCAAACGATACAAAGGGTTAAAGATGACACTAAGGCTCAT  
AAAGAAGAGAAAACACCATTTTATAAAAAACATAGTACATTGCTGTTTGCCACACTACTA  
ATTGCTTTTGGTTACCTTTCTCACTTTGTAAATGGAGAATATAACCTCGTAACTTCCATG  
TTATTTGTAGTTCTATTGTAATTGGCGGATATTCATTATTTAAAGTCGGTTTTCAAAT  
TTGATACGCTTTGATTTGACATGAAAACCTGATGACCGTTGCCGTTATTGGAGCTGCC  
ATTATTGGTGAATGGGCAGAGGCATCTATTGTTGTTATTCTTTGCAATCAGTGAAGCA  
CTTGAACGCTTCTCTATGGACAGAGCAAGACAATCCATACGTTTCATTGATGGATATCGCC  
CCAAAAGAAGCACTAGTTAGACGAAATGGTCAGGAAATAATAATCCATGTGGACGATATC  
GCTGTGGGTGATATCATGATTGTCAAACCAGGGGAGAAAATTGCCATGGATGGAATCATT  
GTGAATGGCTTGTGCGCTGTCAATCAGGCAGCTATAACAGGAGAATCTGTTCCCGTCTCC  
AAAGCGGTAGATGACGAAGTATTTGCAGGTACGCTTAACGAAGAGGGACTAATTGAAGTA  
AAAATCACCAATACGTAGAAGATACAACCATTGCCAAGATTATTCATCTTGTGTAAGAA  
GCACAAGGGGAGCGTGCTCCAGCCCAAGCATTTCGTTGATAAATTTGCGAAATACTACACT  
CCGATCATTATGGTTATTGCAGCCTTGGTTGCAGTCGTTCCACCCCTATTCTTTGGTGGC  
AGTTGGGATACATGGGTTTATCAAGGATTAGCAGTTCTTGTAGTTGGATGTCCTTGTGCA  
TTAGTTATTTCTACTCCAATCTCGATTGTCTCGGCAATTGGAATGCAGCGAAAAAAGGT  
GTGTTGGTTAAAGGTGGTGTCTATCTCGAGAAATTAGGAGCCATTAAGACAGTCGCATTT  
GATAAAACAGGAACACTGACAAAAGGTGTACCAGTGGTAACAGATTTTGAAGTATTAAT  
GACCAAGTGAAGAAAAAGAGCTATTCTCTACCATTACAGCTTTAGAATATCGTTCACAA  
CATCCACTTGCTTCAGCAATAATGAAAAAGGCAGAGCAAGATAATATCCCTTATTCTAAT  
GTACAAGTGAAGAATTCACCTCGATTACTGGGCGAGGTATAAAAGGGATTGTAAACGGA  
ACTACTTACTATATTGGAAGCCCAAACTTTTCAAGGAATTAATGTTTCCGATTTTAGC  
CTTGGGTTTGA AAAACAATGTGAAAATCCTACAAAACCAAGGAAAAACAGCCATGATTATT  
GGAACGGA AAAACAATCTCGGCGTAATTGCCGTTGCAGATGAGGTTTCGTGAAACAAGT  
AAAAATGTGATTCAAAAACCTTCATCAGTTAGGTATCAAGCAAACAATTATGCTGACAGGT  
GATAATCAAGGTA CTGCAAATGCAATCGGTACACATGTAGGCGTTTCTGATATTCAGTCT  
GAATTGATGCCACAGGATAAATTAGATTATATTA AAAAATGCAATCGGAGTATGATAAT  
GTAGCTATGATTGGCGATGGCGTTAATGATGCTCCAGCACTTGCTGCATCTACTGTTGGA  
ATTGCAATGGGCGGTGCTGGAACGGATACTGCAATTGAAACAGCTGATATTGCATTAATG  
GGAGATGATTTAAGTAAGCTTCCATTTGCAGTAAGACTCAGTCGAAAAACTTTAAATATC  
ATTAAGCTAACATCACTTTTGCTATCGGAATTA AAATAATTGCCTTACTATTAGTTATC  
CCGGGATGGTTAACCCTTTGGATAGCGATTCTTTCCGATATGGGAGCTACTATTTTGGTA  
GCATTAATAGTTTACGACTGATGAGAGTGAAGGATAAATAG

>cadA2\_AAN17939.1 *Staphylococcus saprophyticus* partial cadmium  
resistance ATPase

AACAAATAGCTGGAGTTGAGGATGCAAAAGTAACTTTGGCGCTTCTAAAATTGATGTAT  
ATGAAAATGCATCGGTTGAAGAACTTGA AAAAGCAGGTGCTTTTGAGAATCTAAAAGTAT  
CTCCTGAAAAACTAGCGAATCAAACGATACAAAGGGTTAAAGATGACACTAAGGCTCATA  
AAGAAGAGAAAACACCATTTTATAAAAAACATACATTGCTGTTTGCCACACTACTAATTG

CTTTTGGTTACCTTTCTCACTTTGTAATGGAGAAGATAACCTCGTAACTTCCATGTTAT  
TTGTAGGTTCTATTGTAATTGGCGGATATTCATTATTTAAAGTCGGTTTTCAAATTTGA  
TACGCTTTGATTTGACATGAAAACCCTGATGACCGTTGCCGTTATTGGAGCTGCCATTA  
TTGGTGAATGGGCAGAGGCATCTATTGTTGTTATTCTCTTTGCAATCAGTGAAGCACTTG  
AACGCTTCTCTATGGACAGAGCAAGACAATCCATACGTTTCATTGATGGATATCGCCCCAA  
AAGAAGCACTAGTTAGACGAAATGGTCAGGAAATAATAATCCATGTGGACGATATCGCTG  
TGGGTGATATCATGATTGTCAAACCAGGGGAGAAAATTGCCATGGATGGAATCATTGTGA  
ATGGCTTGTCCGCTGTCAATCAGGCAGCTATAACAGGAGAATCTGTTCCCGTCTCCAAAG  
CGGTAGATGACGAAGTATTTGCAGGTACGCTTAACGAAGAGGGACTAATTGAAGTAAAAA  
TCACCAAATACGTAGAAGATAACAACATTGCCAAGATTATTCATCTTGTTGAAGAAGCAC  
AAGGGGAGCGTGTCCAGCCCAAGCATTGTTGATAAATTTGCGAAATACTACACTCCGA  
TCATTATGGTTATTGCAGCCTTGTTGCAGTCGTTCCACCCCTATTCTTTGGTGGCAGTT  
GGGATACATGGGTTTATCAAGGATTAGCAGTT  
>cadA\_Staphylococcus aureus\_HQ634347.1  
TTGGATAGTTCAGCAAAAACATTAACAGAAGATAAACAGGTTTACCGTGTGGAGGGTTTCTCGTGTGC  
GA  
ATTGTGCTGGGAAGTTTGAAAAAATGTAAAACAACCTAGCTGGAGTTCAGGATGCAAAGTGAACCTT  
GG  
CGCTTCCAAAATTGATGTATATGGAAATGCATCGGTTCAAGAGCTTGAAAAGCAGGTGCTTTCGAGA  
AT  
CTTAAGGTATTTCCCGAAAACTAGCGAATTCATCGATGCAAGCGGTCAAAGAAGACACTAAGGCTCC  
TA  
AAGAAGAGAAAATACCGTTTTATAAAAAACACAGCACATTGCTGTTTGCCACATTACTGATTGCTTTT  
GG  
TTACCTTTCTCACTTTGTAATGGAGAAGATAACCTTGTAACCTCCATGTTATTTGTAGGTTTCGATTG  
TA  
ATTGGCGGATATTCACTATTTAAAGTTGGTTTTCAAATTTGATACGCTTTGATTTGACATGAAAAC  
CC  
TGATGACCGTAGCAGTTATTGGAGCTGCCATCATTGGTGAATGGGCAGAGGCATCCATTGTTGTCGTT  
CT  
CTTTGCAATCAGTGAAGCACTTGAACGTTTTTCTATGGATAGAGCAAGACAGTCCATTCGTTTCATTGA  
TG  
GATATTGCCCCAAAAGAAGCACTTGTTATGCGGAATGGTCAGGAAATAATGATCCATGTGGACGATAT  
TG  
CCGTGGGTGATATTATGATCGTCAAACCAGGGGAGAAAATTGCCATGGATGGGATCATTATAAATGGT  
GT  
GTCGGCTGTCAACCAGGCTGCTATAACAGGAGAATCTGTCCCTGTTGCCAAAACGGTAGATGATGAAG  
TA  
TTTGCAGGTACGCTTAACGAAGAGGGACTACTTGAAGTAAAAATCACCAAATACGTAGAGGATACAAC  
TA  
TCTCCAAGATTATTCATCTGGTTGAGGAAGCACAAGGGGAGCGCGCTCCAGCGCAAGCATTTCGTAGAT  
AA  
ATTTGCGAAATATTATACGCCGATCATTATGGTTATTGCGGCGCTCGTTGCAGTCGTTCCACCTTTAT  
TC  
TTTGGTGAAGTTGGGATACTTGGGTTTATCAAGGATTAGCGGTACTTGTAGTTGGATGTCCGTGTGC  
AT  
TAGTTATTTCTACTCCAATCTCGATTGTCTCGGCAATTGGAAATGCAGCTAAAAAAGGTGTGTTGATT  
AA  
AGGCGGTGTCTATCTAGAGGAATTAGGAGCCATTAAGGCAATCGCATTGATAAAACAGGAACACTGA  
CA  
AAAGGTGTACCAGTGGTAACAGATTTTAAAGTGTTAAATGATCAAGTGAAGAAAAAGAGCTGTTTTTC  
CA  
TTATTACAGCTTTAGAATATCGATCACAACATCCACTTGCTTCAGCAATAATGAAGAAAGCAGAGCAA  
GA

TAATATTACTTATTCCGATGTTAGAGTGGAGGACTTCACTTCTATTACAGGTCGGGGCATTCAAGGGA  
AT  
ATAGATGGAACAACCTATTACATTGGCAGTCCAAGGCTTTTTAAAGAATTAATGTTTCCGATTTTAG  
CC  
TTGAGTTTGAAAATAAAGTGAAAGTTTTACAAAACCAAGGGAAAACGGCCATGATTATTGGAACGGAC  
CA  
AACAACTCTCGGCGTGATTGCTGTAGCAGATGAGGTCCGCGAAACAAGTAAAAATGTGATTCAAAAAC  
TT  
CATCAGTTAGGAATCAAGCAAACAATTATGCTGACAGGTGATAATCAAGGTACCGCAGAAGCAATCGG  
TG  
CTCATGTAGGCGTTTCTGATATTCAGTCCGAATTGATGCCACAGGATAAGTTGGACTATATTA AAAA  
AT  
GAAAGCCGAGCATGGTAATGTAGCTATGATTGGCGATGGCGTCAATGATGCTCCTGCACTTGCTGCAT  
CC  
ACTGTTGGCATTGCAATGGGCGGTGCTGGAACAGATACTGCCATCGAGACAGCTGATATTGCATTAAT  
GG  
GAGATGATTTAAGTAAGCTTCCATTTGCAGTAAGACTTAGCAGGAAAACGCTAAATATCATCAAAGCG  
AA  
CATCACGTTTGCCATCGGAATTAAGATAATTGCCTTACTATTGGTTATTCCAGGCTGGCTAACCCTTT  
GG  
ATTGCGATTCTTTCCGATATGGGAGCCACTATTTTGGTAGCATTAAATAGTTTGGCGACTGATGAGAGT  
GA  
AGGATAAATAG

>zinT\_SCS82387.1 *Staphylococcus saprophyticus* Mn+2/Zn+2 ABC  
transporter periplasmic protein

ATGAAGAGAATGACATACTTACTTATAATCACTGTAGCACTTATTGTGCGTTTTAGCAGGC  
TGTGGTAATACAGATAAAGATAAATCGGGGAGCAACGATGGCAAGAAAATTAATAATTAAT  
ACAACGTTTTTCCGTTAAAATCATTTCAGAACAAATTGGCGGGAAACATGTTGAAGTT  
TCGTCTATTTATCCAGCAAAGACAGATTTACATAGTTATGAACCAACACAAAAAGATATT  
ATTAATGCTTCAAAGGCTGATTTATTTTATATACAGGTGATAACCTAGATCCCGTAGCC  
AAAAAGGTAGCAGCAACAATAAAACAAGATGATAAAAAATTATCACTTGAAGACAAATTA  
GATAAATCACAATTATTAACAGATCAACATAGTCATGACGAAGAATCACATGAACATAGT  
GAAGAAGCACACCATCATCATGGTGGTTATGATCCGCACGTTTGGTTAGATCCTAAGTTT  
GATCAAACATTTGCAAAGGCAATCAAAGATGAATTAGTAAAGAAAGATCCTAAACATAAA  
GCAGAATATGAGAAGAATTATCAAAAATTAATAAAGATCTTGAAAAAATTGATAAACAA  
ATGACAGATATTACGAAAGATAAACAAGACAATACGGTATTTATTTACATGAATCTATT  
GGATATTTAGCTGAAAGATATGGATTTGTACAAAAAGGGGTACAAAACATGAATGCAGAG  
GATCCTTCGCAAAAAGCCTTAACCTAAGATTGTAAGAGATTAAGATTGAGGAGCAAAA  
TACATTTTATATGAAGATAATGTATCGAATAAGGTAACGGAAACGATTGTAAGAAACA  
GATGCAAAAACCTTTAAAATTCTACAATATGGAATCATTAAATAAAGCGCAGCAACAAAAT  
CACAAAATAACTTATCAATCATTGATGAAGCAAAATATTACGAATATTGACAAGGCGCTT  
AGTGATGAACATAAAAATTAATGACCATAGCAAAGAAAATTCAAATATGACAAGGCAATA  
TCAGATGGTTATTTTAAAGATTCACAAGTGAAGGATAGAAATTTAGCTGATTATAAAGGA  
AATTGGCAGTCTGTATATCCTTATTTAAAAGATGGCACGCTTGATGATGTTATGAAACAT  
AAAGCAGAAGAGGATGATTCGATGTCTGAGAAAGCATATAAAGCTTATTATGATAAAGGT  
TATAAACAGATATCAATCACATTAATTAATAAAGATGATACGATAACATTTGAAAAAGAT  
GGCAAAAAAATTACAGGGAAATACATTTACGATGGCAAAGATATTTTAAAATATGAAAAA  
GGTAACAGAGGTGTTAGATACACTTTTAAATTAAGAATAATGGGCAAGAAGGATTACCA  
AAATATGTACAATTTAGTGATCATAATATTGCACCTAAGAAGTCAGAACACTTCCATATA  
TTTATGGGGAATGACAAAAAGAAAGTATTGAAAGAAGTACTAGATAATTGGCCAACATATTAT  
CCAGCTAACTTAGATGGTAAAGGTATTAAGAAGAATGATGGCACATTA

>zinT\_Staphylococcus saprophyticus KS40\_05210 zinT Metal-binding  
protein ZinT 550903:552435 forward

TTGAAACAAATTACATACATTAGTATTATGGTTCTGGCATTGATGGTAGTTCTAGCCGGT

TGTGGAAAAGGAGAGTCCGATAATACAAAATCGAATGAAAAAATAAAAATAAATACAAC  
GTTTTCCCTTTGAAGTCATTTGCTGAACAAATAGGTGGTAAACACGTAGAGGTGAATTCT  
ATCTACCCAGCTGGAACAGATTTACATAATTACGAACCTACACAAAAGATATAATTAAT  
GCATCAAAGCGGACTTATTTCTATATACTGGTGACAATTTAGATCCAGTTGCTAAAAAA  
GTAGCAAGTACAATTA AAAAAGATGATAAAAAATTAGCACTTGAAGATAAATTAGATAAA  
TCTCAATTGCTTACGGACCAACATAGTCATGAAGAAGAAGGACATGACCATGATGAACAT  
CACCATCATGGCGGATACGATCCTCATGTTTGGTTAGATCCTAAATTTGATCAGACATTT  
GCTAAAGAGATTAAGATGAACTAATTAAGAAGGATCCTAAACACAAGAAAACATATGAA  
AAAACTATGAAAAATTAATAAGGATTTAAAAGAAATAGATAAAGATTTGAAATCTATT  
ACTGAAAATAAAGAAGGTAATACGATATTTATATCTCATGAATCTATTGGATATCTTGCA  
GAAAGATATGATTTTGTTCAAAAGGTGTACAAAATATGAATGCTGAAGATCCTTCACAA  
AAATCATTGTGCAACATTGTGAAAGAAATTAAGCTTCTGGAGCTAAATATATTTTATAT  
GAAGATAATGTATCAAATAAAGTGACAGACACAATACGTAAAGAAACAGAGGCCAAAACCT  
TAAAAATTTTATAATATGGAATCTTTAAATAAATCGCAGCAACAAGATTATAAGTTGAGT  
TATCAATCATTGATGAAGAAAAATATTATAAATATGGATAAAGCATTAAAGTGATTCTATT  
CAAACGAAGACGATAAGGAACAAAGTAAACATGATAAAGCGATTTCTGACGTTATTTT  
AAAGATAGCCAAGTTAAAGATAGAACATTGGGTGATTATAAAGGCAACTGGCAATCAGTT  
TATCCTTACTTAAAAGATGGCACTTTGGATGAAGTTATGGAACATAAAGCAGAAGATGAT  
GATTCCATGTCTGCTAAAGCATATAAGTCATATTATGAAAAAGGTTATAAAACAGATATA  
AGTCATATTACTATTTCAAACGATACAATAACGTTTAAAAAGATGGTAAAAAAGAACT  
GGGAAATATGTATATGATGGCAAAGATATTTTAAATATGAAAAAGGTAACAGAGGTGTG  
AGATATACTTTTAAATTAGTAGATCAAAATAGTCATTTACCTAAATATGTACAGTTCAGT  
GATCATAATATTGAACCGAAAAAGCTGCACATTTCCATATTTTTATGGGCAATAATAAA  
GATAAAATTTTAAAAGAATTAGATAATTGGCCAACATATTATCCAATTCGTTAAGTAGC  
GAGGAAATTAAGAGGAAATGTTAGCTCATTA

>znuC\_SCS23657.1 *Staphylococcus saprophyticus* ABC transporter  
ATPase : Location:1..774

ATGTCTACGCCAGTATTCGAATTA AAAAATATAGATTATTATTTTGATAATAACAAGTA  
CTTGAAAATATAAATATAAAAATTAATAGAGGAGAATTTGTAGCAATTGTCGGTCCAAAT  
GGCGCTGGAAAATCGACTTTATTA AAAAATATCCTTAGGTTTATTGCCATTCAAAAAGGT  
CAAATGTTTGTGATGGCATTGATTATAATGGCAAGCAATCGTTATTA AAAAATTAGCTAT  
GTTTCACAAAAGCTCAAGCATTCAAAGCTGGATTCCCTGCAAGCGTTAAAGAAGTAGTT  
ATTAGTGGTCTTACAAAACGTA AAAGATTATTTCAATGGTTTAAACAAAATGATGAGCAA  
CAAGTTGTTTCAGTTTTAAAACGTTTTAAATATTGAACATCTGATAGATAAAAATATCGCT  
GAATTATCAGGTGGTCAACAACAAGAGTCTTAATTGCTCGTGCATTAATCAGTAATCCA  
TCTGTACTCATACTAGATGAACCAACAATGGTATCGATGCCAAGCATGTTAGTGAATTC  
TATGAAACATTAGAGACGCTTAAAATGATGGTGTAAACGATTATTCTAGTTACGCATGAT  
ATTGGTGTGTTGCAGACACGGCTACAGAAGTCGCTTGTTTAATAAGCATCTTCACTTC  
CATGGAACAACAGAAGATTTTAAATCACTTGATGAGGTCGAAATTTCCAAAATTTACGGA  
CATCCTATACAATTCGTTGATCATCAACATAGTAGGGAGTGCTGTTTCATCATGA

>znuC1\_ *Staphylococcus saprophyticus* KS40\_12990 znuC\_1 High-affinity  
zinc uptake system ATP-binding protein ZnuC 1287517:1288290 forward

ATGACTACACCAGTATTCGAATTA AAAAATATTGATTATTATTTTGATAACAACAAGTA  
CTTGAAAATATAAATATAAAAATTAATCGAGGAGAGTTTGTGCAATTGTAGGACCCAAT  
GGTGTGAAAATCAACACTATTGAAAATATCCTAGGGTTATTACCTATCCAAAAGGT  
CAAATATATGTGGATGGAAAAGATTATAATGGCAAACAATCATTGTTAAAATAAGTTAC  
GTCTCACAAAAGCACAAAGCCTTTAAAGCGGGTTCCCTGCAAGTGTTAAAGAAGTTGTG  
ATAAGTGGTCTAACTAAACGTA AAAGACTGTTTCAATGGTTCAATAAAAAGATGAGAGA  
AAAGTAGAAATTGTATTA AAAAGACTGAATATAGAACATTTAATAGATAAAAACATTGCT  
GAATTATCCGGAGGACAACAACAACGCTCTTAATAGCTAGAGCACTTATAAGTGAGCCT  
TCGGTATTAATTTTAGATGAACCGACCAGTGGTATTGATGCAAAACATGTTAGTGAATTT  
TATGAAACGTTGAAAAGACTCAAAAATGAAGGCGTAACAATTATACTAGTAACGCATGAT  
ATTGGTGTGGTTGCCGATACAGCTACAGAGGTTGCATGTCTCAATAAACATTTACATTT  
CATGGAACAACAGAAGCATTTAATCTCTAGACGAAGTAGAAATTTCAAAAATTTATGGT

CATCCAATACAATTTGTTGATCATCAACATAGTAGGGAGTGTTGTTTCATCATGA  
>znuB\_Staphylococcus saprophyticus KS40\_13000 znuB High-affinity  
zinc uptake system membrane protein ZnuB 1288287:1289147 forward  
ATGATAGAAGCCCTACTGAATTTTGATTTTATGAGATATTCACCTTATCAGTGGTATATTA  
ATTGGTTTCATTGCACCACTTATTGGTGCTTTTATCGTTGTTAGAAGATTGTCACCTCATT  
GCCGATGCACTCAGTCATGTTACACTGGGAGGTATTTCCCTTTGGCATGTTTCATTATAACG  
GTGATACCAGCATTTGTATTTATTAACCCAATGTGGTTTGGTATTTTATTTGCTATTATA  
GGCGCTTTACTTATAGAGAATTTAAGAACATCTTATAGTAATTATCAGGAAATTGCGATA  
CCTATCATCATGAGCGCAGGTATTGCATTAAGTGCTATCTTTATATCACTCGCTGATGGA  
TTTAACCAAGAAATAGTTGGGCTATTATTTGGTTCAATCAGTGCTGTTACATTAAGTGAT  
TTATCAACTATTATCGTGATTGTAGTTATCGTACTCATATTTATTTTCTCATTTTATAAA  
GAACTATTTATATTATCGTTCGATGAGGAATATAGTAAAGTAATTGGAATCCAAAATGG  
ATACAATTTTTATTTATAATTATCGTTGCAATGGTAATTTCTGCTTCTATGCGTGTTGTA  
GGCATATTATTGGTAAGTGCTTTAATTACGTTACCAGTAGCAGTTTCAATGCGAATAACT  
AAAGGATTTAAACAATTAATTATATTGAGCGTGATTATTGGAGAGTTTTCTGTTATCGCT  
GGACTTGTCTAGCATTTTATATGAATATATCTCCTGGCGGTGTAATAGTAGTACTACTT  
GTACTTATTTTAGCAATAACGATGATGTATCAAAGATTAAGTAAATCGATTAAGGA  
GTTGCTAAAGATGAAGACTGA

>zur\_Staphylococcus saprophyticus KS40\_13010 zur Zinc-specific  
metallo-regulatory protein 1289137:1289550 forward

ATGAAGACTGAAGAAGCTATTGGCATTATTAATAATCATGGACACAAATATACAAATAAA  
AGACGTGAAATGATTGATATTTTTGTAGAAGAAGATAAATACATCAATGCAAAAATAATA  
CAACAAAAAATGGACAAAAATTACCCTGGCATTTCATTCGATACAATTTATAGAACTTA  
CATTTATTTAAAGATTTAGGTATTGTAGAAGGTAAGTGAATTAGATGGAGAAATGAAATTC  
AGAATTGCATGTACTGATCATCATCACCATCATTTTATTTGTGAATCCTGTGGCGATACA  
AAAGTAATAGATTTTTGTCCAATTGATCAAATTAAGCATTTTTACCAAAAGTAGATATT  
CACACACATAAATTAGAAGTTTATGGCATATGCGAATCGTGCCAAAAAGCATAA

>cadD\_CBW54954.1 Staphylococcus saprophyticus subsp. saprophyticus  
MS1146 cadmium resistance transporter

ATGATCGCAACGATACTTACAGCAGCTGCGGTATATGTAGCAACAGGAATTGATTATCTC  
GTTATATTAATTCTTTTGTTCGCAAGTAAAAAAGGTCAGGTGAAACATATTTGGATA  
GGACAATATATAGGGACTGCAATTGTTATAGGAGCAAGTCTTTTAGTTGCACAGGGGTT  
GTAAATTTAATTCCTCAGCAATGGGTTATCGGACTACTTGGACTTTTACCCTTTACTTA  
GGTGTGAAAATGTGGATTAAGGAGAAGAGGATGAAGATGAAAGTAGTATTTTATCTTTA  
TTCTCCTCTGGAAAATTTAATCAGTTATTTTTGACGATGACTTTTCATCGTATTAGCTTCC  
AGTGCGGATGACTTTTCGATTTATATACCGTACTTCACGACCTTAAATATGTCTGAAATC  
TTTATTGCTGTTATTGTCTTTTTGATTATGGTTGCTGTTTTATGTTATGTCAGCTATCGC  
TTAGCTTCCTTAGATTTTGTATCAGAAAAAATTGAGAAATATGAACGTTGGATTGTACCT  
ATTGTATTCATTGGGTTAGGGATTTATATATTGTTTAAAATGGTACATTTAACGCTTTA  
TTCTCATTTCTTTAA

>cadD\_NC010419.1:30146-30763 Staphylococcus aureus plasmid pTZ2162  
TTAAAATATAAATCCTAAAATTGTTTGAATAGTGTCAATTTCAATAATAATAAATAAACCTAAAGCTA  
TA

TAAATAATAGCCATAATCCAACGACTAAATTTCTCAACAATTTCTCCAATTCCTGGAATATTAGCTAA  
TT

TTTGTGCAGTAAACACCAAGAAGAAAATTAATTAATAAAGACAAACAGAGTAAGTAATAAATTAGTA  
AC

ACTTAATGTCACAAAATACGGAACAAATAACCAATATTATCGGCGCCACAACCTTGCTATCGTAACAA  
TT

GCAACCGTACCAACTAATTTAGACAATCCTTTTTATTCAATTCTTTTTTAGCTCTCTTTTCTCCTTC  
AC

AATCATCATAAATAGCCACTTTAATTCCAAGATAAATTGGTATTAACCCAATAAACCTAATATCCAC  
TT

TTCTGGAACATAATTTAATACAAAAGCTAAAAACAACTAACTAATATTAATAAATAGACCCTAAT

AT  
TGACCAACATAAATATCTCTATATTCTTTTCTAGTCTTTGCTCTAGCAAAAAATATTAATAAAATTAC  
TA  
ATAAATCAACTGCTGTAGCAATATAAAGAACAGCAGCAGCAACAACCGTTTGAATCAT  
>cadDSa1\_NC\_013550.1:15154-15783 Staphylococcus aureus plasmid  
pB0Ra53  
ATGAGGTGATTATGATTCAAACGGTTGTTGCTGCTGCTGTTCTTTATATTGCTACAGCAGTTGATTT  
AT  
TAGTAATTTTATTAATATTTTTTCTAGAGCAAAGACTAGAAAAGAATATAGAGATATTTATGTTGGT  
CA  
ATATTTAGGGTCTATTATTTTAATATTAGTTAGTTTGTTTTTAGCTTTTGTATTAATTATGTTCCAG  
AA  
AAGTGGATATTAGGTTTATTGGGTTTAATACCAATTTATCTTGAATTAAGTGGCTATTTATGATGA  
TT  
GTGAAGGAGAAAAGAGAGCTAAAAAAGAATTGAATGAAAAGGATTGTCTAAATTAGTTGGTACGGTT  
GC  
AATTGTTACGATAGCAAGTTGTGGCGCCGATAATATTGGTTTATTTGTTCCGTATTTTGTGACATTAA  
GT  
GTTACTAATTTATTACTTACTCTGTTTGTCTTTTTAATTTAATTTTCTTCTTGGTGTTTACTGCACA  
AA  
AATTAGCTAATATCCCAGGAATTGGAGAAATTGTTGAGAAATTTAGTCGTTGGATTATGGCTATTATT  
TA  
TATAGCTTTAGGTTTATTTATTATTATTGAAAATGACACTATTCAAACAATTTTAGGATTTATATTTT  
AA  
>cadC\_CBW54956.1 Staphylococcus saprophyticus subsp. saprophyticus  
MS1146 transcriptional regulator  
of cadmium efflux system  
ATGAAAAGAAAGATACTTGTGAAATTTTTTGTATGACGAAGAAAAGGTTAATCGAATA  
CAAGGGGATTTACAAACAGTTGATATTTCTGGTGTAGCCAAATGTTAAAGGCTATTGCC  
GATGAAAATAGAGCAAAAATTACTTACGCTCTGTGTGTCAGGATGAAGAGTTGTGTGTTTGT  
GATATAGCAAATATCTTAGGTATTACGATAGCAAATGCATCTCATCATTTACGTACGCTT  
TATAAGCAAGGGTGGTCAACTTTAGAAAAGAAGAAAAGTACTGTTTCTATTCTTTAGAT  
GATGAACATATCAGGCAGATAATGATGATCGCCCTAGCACATAAGAAAGAAGTGAAGGTC  
AATGTCTGA  
>cadD\_NC\_005127.1:1415-2044 Staphylococcus aureus plasmid pUB101  
TTAAAATATAAATCCTAAAATTGTTTGAATAGTGTCAATTTCAATAATAATAAATAAACCTAAAGCTA  
TA  
TAAATAACAGCCATAATCCAACGACTAAATTTCTCAACAATTTCTCCAACCTCTGGAATATTAGCTAA  
TT  
TTTGTGCAGTAAATACCAAGAAGAAAATTTAAAATTTAAAAGACAAACAAAGTAATTAATAAATTAGTA  
AC  
ACTTAATGTCACAAAATATGGAACAAATAAACCAATATTATCAGCACCACAACCTTGCTATCGTAACAA  
TT  
GCAACCGTACCAACTAATTTAGACAATCCTTTTTTATTCAATTCTTTTTTAGCTCTCTTTTCTCCTTC  
AC  
AATCATCATAAATAGCCACTTTAATTTCAAGATAAATTGGTATTAACCCAATAAACCTAATATCCAC  
TT  
CTCTGGAACATAATTTAATACAAAAGCTAAAACAACTAACTAATATTAATAAATAGACCCTAAT  
AT  
TGACCAACATAAATATCTCTATATTCTTTTCTAGTCTTTGCTCTAGCAAAAAATATTAATAGTATTAC  
TA  
ACAAATCCACTGCTGTAGCAATATATAAAACAGCAGCAGTAATCACAGTCGAAAACATAAAGCACCTC  
AT  
>czcD\_SCT26427.1 Staphylococcus saprophyticus Cobalt-zinc-cadmium



resistance protein

ATGGATAGAAAAACAAATTATTTTCACCATGTAGATCATAGAAAATTTCAAATAGCTCT  
AAATATACTTTGGACTTCGTTAATAATTACAATCATTTTTACTATTATTGAGTTTGTT  
GGAGGAATTGTTGCTAATTCATTAGCATTGCTTTTCAGATTCATTTTCATATGTTAAGTGAC  
GTATTAGCATTAGGTTTATCAATGGTTGCTATATATTTTGCAAGCAAAGCACCTACTCAA  
AAATATACTTTTGGATTTTTAAGATTAGAAATTATAGCAGCTTTTCTTAACGGTTTAGCC  
TTAATGGTTATCTCTTTATGGATATTATATGAAGGTATTGTAAGAATTATTCATCCGCAA  
CAGGTTGAAAGTGGTTAATGGTATTTATTGCTAGTATTGGACTGATAGTAAATATCATA  
TTAACTGATTTTTAGTCAGATCTTTGAAGAAAGAAGACAATGTCAATATTCAAAGCGCG  
CTGTGGCATTTTATGGGAGATTTATTAATTCTGTAGGTGTTATTGTGGCTGTAATTTTA  
ATACATTTTACTGGGTGGTATATTATCGACCCAGTGATTAGTATCATTATATCTTTAATC  
ATTTTAAATGGTGGTTTTAAATTACGAAAAATGCATGGAAAGTCCTTATGGAAAGTGTG  
CCGGATGAATTTCAAACAGATGCCATTATAGATGATATGAAATCAGTTGAAGGTGTCATT  
GATGTCCATGAATTTCAATTTATGGAGTATTACAACGAACCATAGTTCATTAAGTGCACAT  
GTCGTTTTGAGCGATAAGTATATCCAGTCTCCTTATGCAACGATAAATAAAGTATCTGAG  
TTATTGAGAAATAAACATGGTTTGAACATGTAACACTACAAATTGAAAATATTGATTTA  
AATCATCTCAATGAAGCATATTTTAAACAATATCAGTAA

>czcD\_CXN90647.1 *Staphylococcus aureus* Cobalt-zinc-cadmium  
resistance protein

ATGTCTCATTACATCATCATCATGACCATATGCATAGTCATGTAECTACAAATAATAAG  
AAAGTATTGTTTATATCGTTTTTAATAATCGGTCTATATATGTTTATCGAAATCATCGGC  
GGTCTCCTTGCTAACAGCTTGGCATTACTATCTGACGGTATCCATATGTTTAGCGACACA  
TTCTCATTAGGTGTTGCTTTAATCGCATTATATATGCTGAAAAGAATGCCACAECTACA  
AAAACATTTGGTTATAAACGTTTTCGAAGTACTCGCAGCGTTATTTAACGGTGTAAACGCTT  
TTTGAATAAGTATTTTAATTGTTTTTGAAGCGATTAACGTTTCTTTGTTCTTCTGAA  
GTCCAATCTAAAGAAATGTTAATCATTAGTATTATTGGTTTAATTGTCAATATCGTTGTT  
GCATTCCTTATGTTTAAAGGCGGCGACACTTCACACAATTTAAATATGCGTGGTGCTTTT  
CTACATGTTATCGGAGACTTATTAGGTTTCAGTTGGCGCCATTACTGCAGCTATTTTAATT  
TGGGCATTTGGATGGACAATCGCCGATCCTATCGCAAGTATTTTAGTTTTCCGTTATTATT  
TTAAAAAGCGCTTGGGGTATCACAAAATCTTCAATTAACATTTTAAATGGAAGGCACACCA  
AGTGATGTTGATATAGATGAAGTTATAGCTACTATTAATAAAGGATTCACGAATACAAAGT  
GTGCATGATTGCCATGTTGGACAATTTCAAATGATATGAATGCATTAAGTTGTCATGTT  
GTTGTAGACCATACTGACAATGAAAGAATGTGAATTATTATTAGAAAACATTGAGCAT  
GATTTATTACATTTAAATATTCACCATATGACTATTCAATTAGAAACGCCTAATCACAAA  
CATGATGAATCGATTATATGTTTCAGGAACACATAGTCATTCACATAGCCACCATGCTCAT  
CATCACGCGCATGTACATTA

>cziB\_Staphylococcus aureus 2301412-2302392 strain MRSA252

ATGTCTCATTACATCATCATCATGACCATATGCATAGTCATGTAECTACAAATAATAAGAAAGTATT  
GT  
TTATATCGTTTTTAATAATCGGTCTATATATGTTTATCGAAATCATCGGCGGTCTCCTTGCTAACAGC  
TT  
GGCATTACTATCTGACGGTATCCATATGTTTAGCGACACATTCTCATTAGGTGTTGCTTTAATCGCAT  
TT  
ATATATGCTGAAAAGAATGCCACAECTACAAAACATTTGGTTATAAACGTTTTCGAAGTACTCGCAGC  
GT  
TATTTAACGGTGTAAACGCTTTTTTGAATAAGTATTTAATTGTTTTTGAAGCGATTAACGTTTCTTT  
GT  
TCCTTCTGAAGTCCAATCTAAAGAAATGTTAATCATTAGTATTATTGGTTTAATTGTCAATATCGTTG  
TT  
GCATTCCTTATGTTTAAAGGCGGCGACACTTCACACAATTTAAATATGCGTGGTGCTTTTCTACATGT  
TA  
TCGGAGACTTATTAGGTTTCAGTTGGCGCCATTACTGCAGCTATTTAATTTGGGCATTTGGATGGACA  
AT  
CGCCGATCCTATCGCAAGTATTTTAGTTTTCCGTTATTATTTTAAAAAGCGCTTGGGGTATCACAAAAT

CT  
TCAATTAACATTTTAAATGGAAGGCACACCAAGTGATGTTGATATAGATGAAGTTATAGCTACTATTA  
AA  
AGGATTCACGAATACAAAGTGTGCATGATTGCCATGTTTGGACAATTTCAAATGATATGAATGCATTA  
AG  
TTGTCATGTTGTTGTAGACCATACATTGACAATGAAAGAATGTGAATTATTATTAGAAAACATTGAGC  
AT  
GATTTATTACATTTAAATATTCACCATATGACTATTCAATTAGAAAACGCCTAATCACAAACATGATGA  
AT  
CGATTATATGTTTCAGGAACACATAGTCATTCACATAGCCACCATGCTCATCATCACGCGCATGTACAT  
TA  
A

>czrA\_Staphylococcus aureus 2301090-2301410 strain MRSA252  
ATGTCAGAACAAATATTCAGAAATAAATACAGATACATTAGAACGCGTAACTGAAATCTTCAAGGCATT  
AG  
GCGATTACAATCGAATACGTATCATGGAATTGTTATCAGTCAGTGAAGCAAGTGTGGTGCACATTTCA  
CA  
TCAATTGAATTTATCTCAATCAAATGTCTCGCACCAATTAATAATTACTTAAAAGTGTGCATCTTGTGA  
AA  
GCAAAACGACAAGGCCAATCAATGATTTATTCATTAGATGACATCCACGTAGCAACTATGTTAAAGCA  
AG

CCATACATCACGCGAATCATCCTAAAGAAAGTGGGTTATAA  
>ykoC\_SCS93084.1 Staphylococcus saprophyticus cobalt ABC transporter  
permease : Location:1..807  
ATGTTTGATATTTGGAAAAAGCATCACACCTTTGTTGATGATGTAAATATAATTACCAA  
CTCGCGCTTGGCATTGACTGTTTTCTTTGTAATCTTTGTGCATCAATTTGACTATATG  
CTATATATTACTTTGCTCATACTTATATGCTTATTGATCTTTAATGGCTTACAGTTTAAA  
ATCACAGGCGCTTTTATTATCTTCACAGTTATTTTTCAGTCTAATATCAGCCCTATTTATG  
ATTTTTTATGGCGATGGCACACATACCTTGTTCATTGGGATTTATCCATATTACTATG  
GAAAGTCTATACCGAGGGCTACATTTGGCAATGCGTACAACAACAGTATCCTTTTTTGGT  
ATCCTGATTGCATTTACATCTCAAATCGTATTAGTATTTTACAGCTTAATGCAACATCTT  
AAGGTGAAGCCCAAAGTAGCGTATGCGTTTATGGCTGCCATTTCGTATGGTGCCTTTAATG  
TTCATTTCTTTACTTCAATTAAGAAAATCATTAAAAATCCGTTATCAATTAATTAGCGCA  
CAGAATTATCGTGGCTTTAATAGAATTAACATTTAATCATCCCATTGCTAAGTCAAAT  
ATCAGAAAAGCACATCAACTTTTCAGTTGCAATGGAGAAAAAAGGGTTTAAAGATGGCCCT  
AGAACTTATTATTATCATGCACCTTTCTCGTACAAAGACATTCTATTCGTTGCCCTAGTT  
GTAATTATTTAATAAGTGCTTATTTCTTATCACAACTTACCAATTACCGGCATCGAA  
GACGTTTCGTATAAACCGTATATATTAG

>czrC\_AGX31683.1 Staphylococcus aureus cadmium and zinc resistance  
protein C  
GTGATAGAAATGAAAAATATTCAAGAGCAACAAGCACACGAAAGTCATAGCCACGATCAT  
AGTCATGATCATGATCACGAAAAATGCCAATTATTTTCATATTTTATTGGCTTAGTGTTG  
GCTATAATTGGGCTTTTTTTAAGTGATGCAAATTTATTAATACAAAACATCTTATTTTCA  
ATTGCCACAATCACAGCCGGCTACCATGTAATTATTCTCGAAGGAATTGGAGAGACAGTT  
GAAATACTAAATTAAGGGAAAATTCCTCCTAATTCTCATATTCTAATGGGATTAGCT  
GCAATCGGGGCTTCTCTGATAGGGAGTTTTTGGGAAGGAACCCTTTTGATACTTATTTTT  
TCCGGCGCTATTTTCTTGAAGATTACGCTGAAGGAAAAAGTAAAAGAGAAATTAATAAG  
CTACTCGAAATGAACCAACGACAGCTAAATTAATCCTACCTGATGGAAACACAAAATT  
GTTGATGTCAGTGAATTAAGTTGGAGATCAACTCCAAGTGCTGAACGGTGATCAAGTT  
CCAATTGATGGGATTATTTTATCCGGTACTACCTCAATTGATGAATCTTCTATTAATGGA  
GAAAGTATACCGAAAGAGAAGTCTAAGGGTGACGAAGTTTTTGGAAAGTACGATTAATGGA  
ACAGGTACTTTTACTATGGAAGTCACTAAGGAAAACAAGGATACTGTATTCTCTAAAATT  
TTACAATTAGTTAGTCAAACCAAGATAATCAAACAAAAGCTGCCAGTATCATTCAAAAA  
TTCGAGCCTAAATATGTTAATATAGTTTTAATCGCAATACCATTAGTAATGTTACTTGCT

CCTTTTCTATTTGATTGGACATGGTCGCAAAGTGTTTACAGGGGATTAGTGCTTTTAGTC  
GCAGCTTACCCTGTGCTTTGGCAGCAGCTACTGTATCTGTAACATTGTCTACAACATCT  
AACCTAGCTAAAAAAGGCGTGCTTTCAAAGGAAGTACTTACCTATCACAATTAGCGGAT  
ATAGATGCAATTGCCTTCGATAAAACAGGAACCCTTACGAACGGAGAACCCTAAAGTAACA  
AATTACTATTTCACTCATTCTGTGAACGAAGAAAATATTATTGATATTATAGTCGCCCTT  
GAAAAGGAATCCAATCACCCACTCGCTAATGCTATTTTAGAAAAATTTGAAGTTAAAAAT  
AAAATAGACATCGAAGTTACTAATCAAATTGGAAAAGGTCTGACAGGAGATTATAATGGA  
AAAAATTATCGTATTGGTAAGCCTACTTCTTTTGAAGTGCTTCTGAAGAGTATACCCAG  
TTCAATCATGATTGGGCATCAGAAGGAAAGACGGTTGTATACGTAGCAGAAAAATGAAGAA  
GTTATTGGGATTATAGCTCTAATGGATATCCGAATGAGCATGCTAAAGAAACAATTAAT  
TACTTTAAGAACTTGGTATCCACACGACTTTAATTACTGGTGATTCCGAAATGACGGGA  
AAAGCTGTAGGCGAACAATTGGGAATAGACGAAGTTATCGCTAATGTAATGCCTGAAGAT  
AAATCCAGAATTATAGAAGAACAAAAAGAAAAATTTGGAGTTACTGCCATGGTTGGAGAT  
GGTGTGAACGATGCACCGGCCCTTGTAATGCTGATGTTGGTATAGCTATGGGGGGCGGT  
ACTGATGTGGCAGTAGAAGTATCTGATTTGTTTTAATGCAGAACAAATTTATCTAAATTA  
GTACAGTCTCATAAAATTTCTCAAATATGGGTCTGTTATTAGGCCAAAATATTATTTTT  
TCAATGGCAGTTGTTGCCTTTTTAGTTGTCATTAGTTTGTAGGATTAAGTATATTACA  
ATCAGTGTAATTGTTTCATGAAGGAAGTACTTTAGTTGTTATACTAAATGGACTTCGATTA  
TTAAGATCTAAATAA

>nixA\_AAW37369.1 *Staphylococcus aureus* subsp. *aureus* COL high-affinity nickel-transport protein

ATGATTAATATCATGTTATGAAAGAAGGATATATTTTGACTGTTTTTAAAAATGAGCGC  
TTAAGCTGGTTACCATACATAGCTATTGTCATTTTGTTACACGTTATTGGGTTTAGTTTT  
TTATGGATTGCTGGAAAAGACCATCATATCTTATTTGGTATGGGGATTCTTGCATATACA  
TTAGGTTTGCCTCATGCATTTGATGCAGATCACATTGCTGCAATAGATAATACGGTTTCGC  
AAATTATTACAGCAACGCAAAGATCCATCTGGTGTGGGTTTCTATTTTTCAATTGGACAT  
TCATCTGTCGATTTTTAATGGCTGTTTTTTAGGGGTATCTGTAAAATGGCTAAAGAT  
GAATTACCGCATTCCAAAGATATTGGTGAACGATTGGTACACTAGTTTCAGGTTTCTTT  
TTAGTGCTTATCGGTGTGTTGAATCTAATTATTTAATCTCTTTAATTAAGTTGTTGCT  
AAATTACGTCGTGAACACATTGAAGAAGCTGAAGTCGATGCATTACTTGAATCTAGAGGA  
TTGGTTTCTCGATTTGTAGGACCTTATTTCAAATTAATCACGCGTAGTTGGCACGTATTG  
CCACTTGGCTTTTTATTTGGACTTGGTTTTGATACAGCTAGTGAATTTGCGTTACTCGCT  
CTTTCTTCAGGCGCATCACAACAAGCCATTTCAATTTATCGGAATCTTATCTTTACCAATT  
TTATTCGCATCAGGTATGAGTTTATTGGATACATTAGATGGTGTGTAATGAAGTATGCC  
TATAATTGGGCATTCTTCAATCCTATTCGCAAATCTATTACAATATAACGATTACTGCG  
ATATCAGTCATGGCAGCATTAGTGATTGGGATGATTGAATTGCTACAAATCTTGCTGAT  
AAGTTAGATTTACATGGTGCCTTTTGGGCATTCAATGGTTCGATCGAATTTGATTATTTA  
GGCTATATTTTAGTTGCATTATTTTTAATTACTTGGCTTATTTCAAGTTAATTTGGAAG  
TTTGGTTCGCATAGAACAACAATGGTCTAGATAA

>merA\_AAA98245.1 *Staphylococcus aureus* mercuric reductase

ATGACTCAAATTCATATAAAATACCCATTCAAGGCATGACATGCACAGGCTGTGAAGAA  
CATGTAACCGAAGCATTGGAACAAGCCGGAGCTAAAGATGTTTCGGCCGATTTCCGACGC  
GGTGAGGCCATTTTTGAACTCAGCGATGATCAGATCGAAAAGGCTAAGCAAAATATTTTCG  
GCAGCCGGCTATCAACCCGGAGAGGAAGAAAGCCAGCCCTCTGAAAACAGTGTAGATTTT  
AATCGGGATGGCGATTACGATCTTCTGATTATTGGTTCCGGCGGTGCGGCGTTTTCTGCA  
GCTATCAAGGCCAATGAAAACGGGGCGAAAGTGGCCATGGTAGAACGGGGAAACCGTCCGG  
GGGACCTGCGTTAACATCGGTTGTGTACCGTCAAAAACCATGCTTCGTGCCGGTGAAATA  
AACGGTCTCGCCAAAACAATCCGTTTACCGGACTTCAAACGAGTACCGGTGCTGCGGAC  
CTTGCCCAATTGACCGAACAAAAGATGGATTAGTCAGTCAAATGCGTCAAGAAAAATAT  
ATAGACTTGATCGAAGAATATGGATTTGATCTCATTTCGTGGCGAGGCCTCGTTTATCGAC  
GATAAGACGATACAAGTGAATGGACAAAACATCACGTCTAAAAGCTTTTTAATCGCAACG  
GGGCTTCTCCGGCTGTTCCGGAAATCCCGGAATGAATGAGGTTGATTATTTAACAAGT  
ACATCCGCACTCGAATTAAGAGGTTCCACAACGATTGGCAGTGATCGGTTCTGGCTAT  
ATCGCAGCGGAATTAGGTCAAATGTTTCAACCTCGGAACAGAAGTACTCTCATGCAA

AGAAGCGAGCGTCTGTTTAAAACCTACGATCCTGAAATTTCCGAAGCCATCGATGAATCC  
TTAACTGAGCAAGGACTTAACCTGATCACTGGGGTCACTTATCAAAGGTTGAGCAAAC  
GGTAAGTCGACAAGCATTATATTGAAGTGAACGGTCAAGAACAAGTCATCGAAGCCGAT  
CAAGTCCTCGTGGCAACAGGAAGAAAGCCGAACACAGAGACTTTAAACCTTGAATCAGCA  
GGTGTGAAAACAGGGAAAAAAGGCGAAGTGCTGACCAATGAATATTTGCAAACGTCGAAT  
AACCGAATATATGCCGCGGGCGATGTGACCCTCGGTCCGCAATTCGTTTATGTTGCAGCT  
TATGAAGGCGGGATTGTGGCAAATAATGCGTTGGGTCTAGCGAAACGCAAATCGATCTT  
CGCTTTGTTCCCGGCGTAACCTTACCAATCCATCGATCGCCACAGTCGGCTTGACTGAA  
CAACAGGCAAAGAAAAAGGTTACGATGTCAAACATCGGTCCTTCCGTTGGACGCTGTA  
CCGCGGGCCTTAGTCAATCACGAAACAACAGGGGTCTATAAACTTGTAGTCAACGCCAA  
ACCCAGAAATTGATCGGAGCGCACATTGTGAGTAAAATGCTGGAGATGTGATTTATGCG  
GCAACGTTAGCGGTTCAATTTGGATTGACCATTGAAGACCTTACGGATAGCTTTGCGCCT  
TATTTAACGATGGCTGAAGGATTAAGCTTGCAGCCTTGACGTTTGATAAAGACGTATCG  
AAATTATCTTGTTGTCAGGCTAA
